# Supplementary material for: Fried food consumption, genetic risk, and incident obesity: a prospective study
Source: Royal Society of Chemistry journal article supplement (doi:10.1039/d3fo02803h), 2024-01-01
Supplement: d3fo02803h1.pdf [file d3fo02803h1.pdf]

## Appendix: Supplementary figures and tables

### Content

|                                                                                                                                       |    |
|---------------------------------------------------------------------------------------------------------------------------------------|----|
| Figure S1. Flow of participants in current UK biobank study .....                                                                     | 2  |
| Figure S2. Distribution of the genetic risk score in UK biobank .....                                                                 | 3  |
| Figure S3. Association of fried food consumption and the risk of adiposity stratified by potential risk factors. ....                 | 4  |
| Figure S4. Association of fried potato consumption and the risk of adiposity stratified by potential risk factors.....                | 5  |
| Figure S5. Association of fried white meat consumption and the risk of adiposity stratified by potential risk factors. ....           | 6  |
| Table S1. Characteristics of 940 obesity-associated SNPs in the UK Biobank .....                                                      | 7  |
| Table S2. Diet component definitions used in the AMED score .....                                                                     | 29 |
| Table S3. Basic characteristics of participants from UK Biobank according to fried potato consumption or fried white consumption..... | 30 |
| Table S4. Multivariable-adjusted HRs (95% CIs) for the associations of fried potato with obesity incidence.....                       | 33 |
| Table S5. Multivariable-adjusted HRs (95% CIs) for the associations of fried white meat with obesity incidence .....                  | 35 |
| Table S6. Multivariable Hazard Ratios (95% CIs) of fried food consumption and obesity incidence from sensitivity analyses. ....       | 37 |
| Table S7. Multivariable Hazard Ratios (95% CIs) of fried potato consumption and obesity incidence from sensitivity analyses. ....     | 40 |
| Table S8. Multivariable Hazard Ratios (95% CIs) of fried white consumption and obesity incidence from sensitivity analyses. ....      | 43 |
| Table S9. Lifestyle characteristics of participants from the UK Biobank according to obesity at baseline and the follow-up time. .... | 46 |

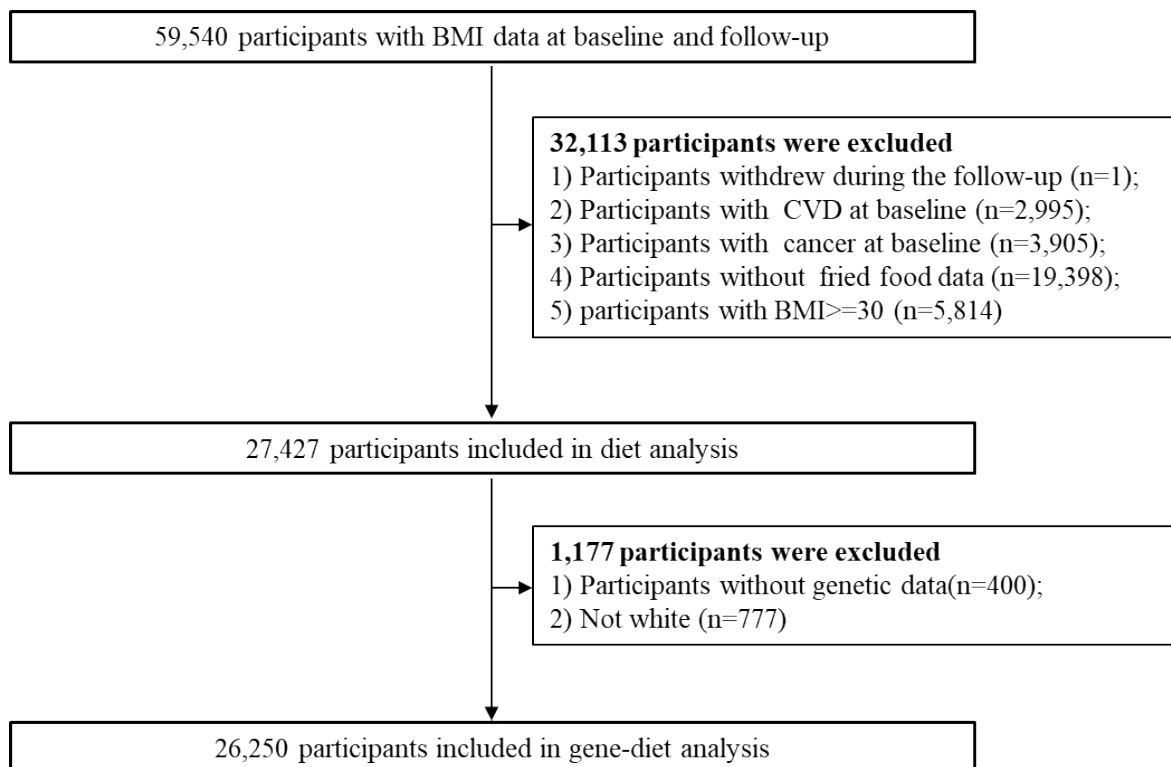

**Figure S1. Flow of participants in current UK biobank study**

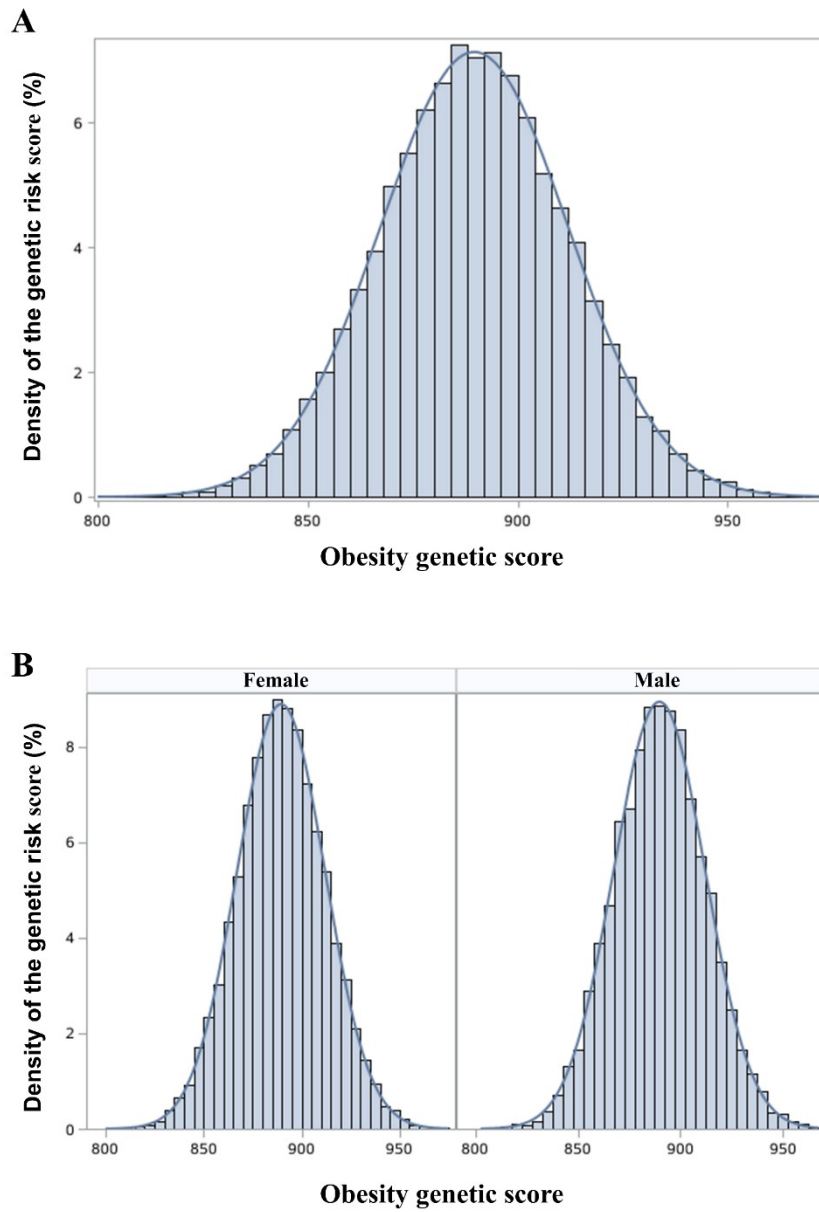

**Figure S2. Distribution of the genetic risk score in UK biobank**

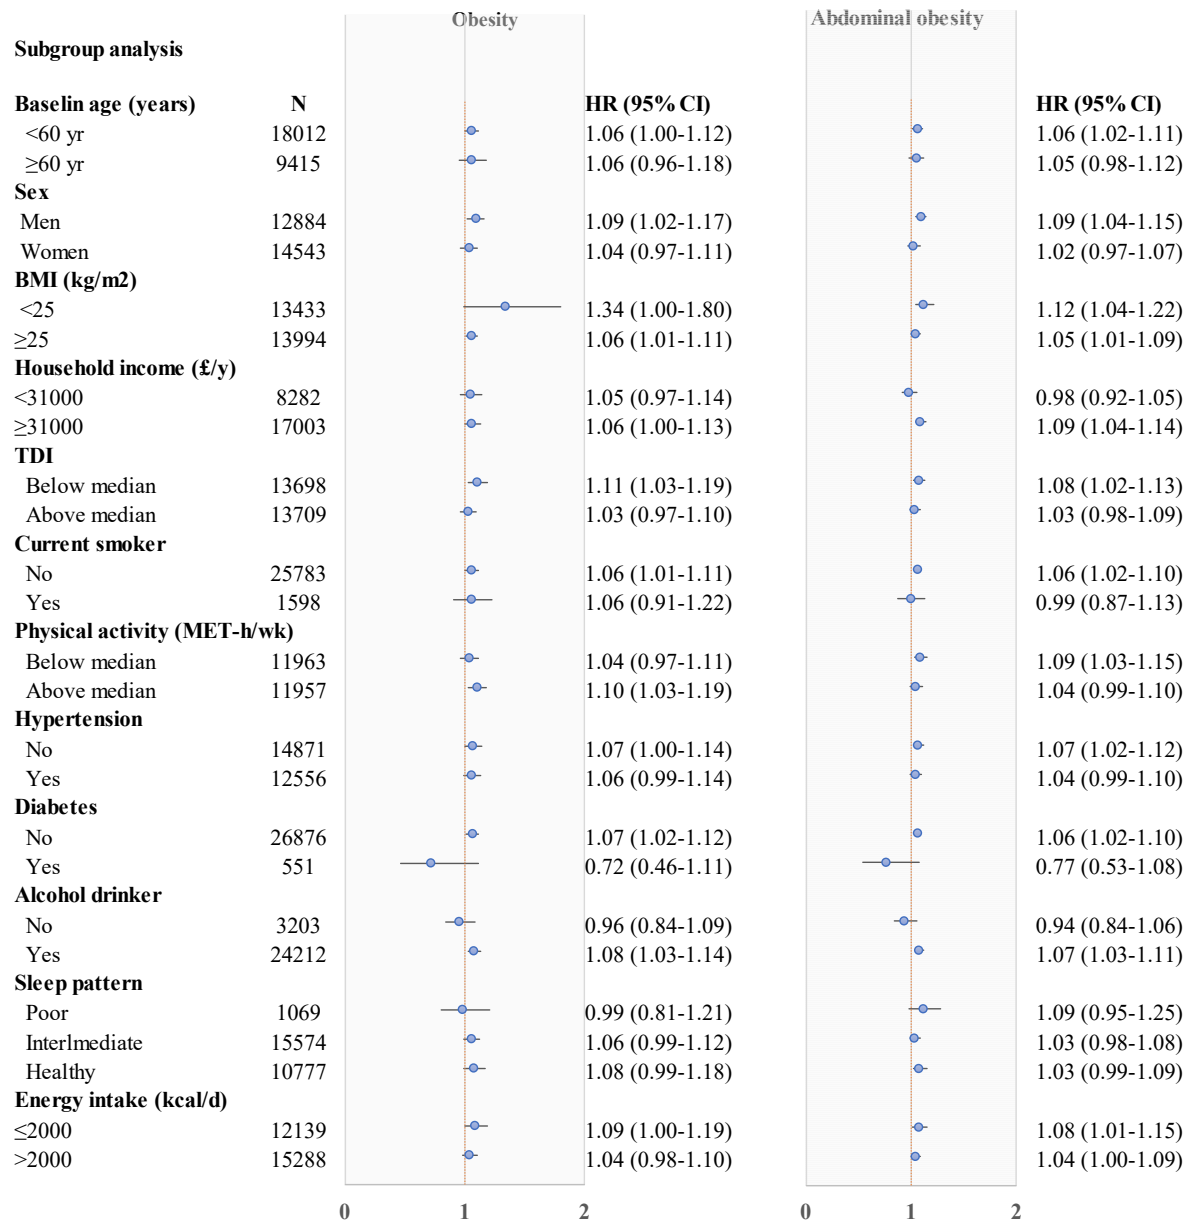

**Figure S3. Association of fried food consumption and the risk of adiposity stratified by potential risk factors.** HRs for the fried food consumption associated with obesity and abdominal obesity were adjusted for age, sex, race, centers, education, Townsend deprivation index, household income, smoking, alcohol consumption, physical activity, sleep pattern, energy intake, and BMI (for obesity) or WC (for abdominal obesity) at baseline.

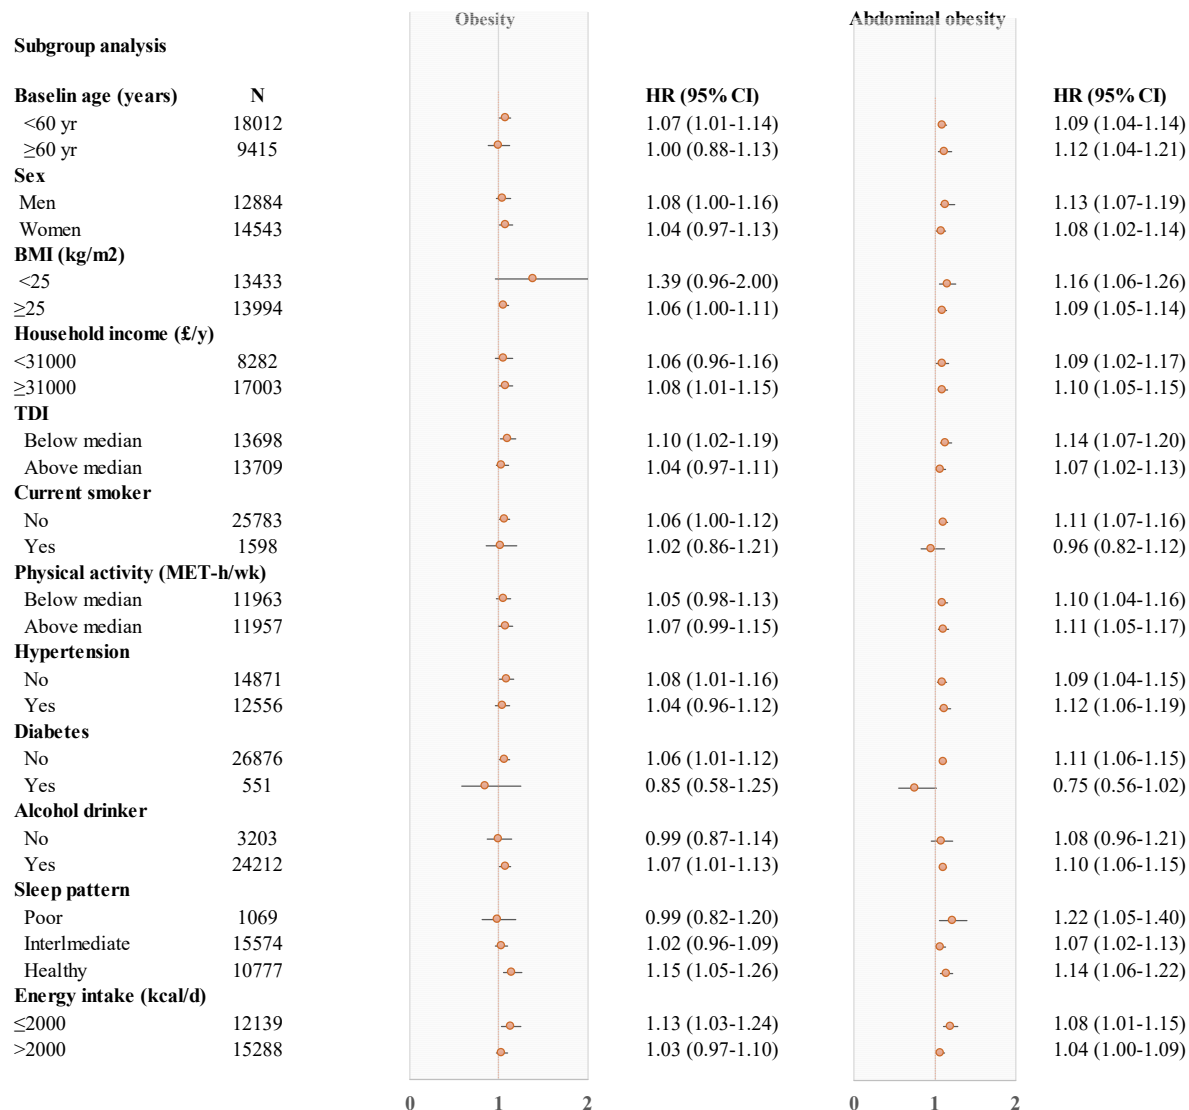

**Figure S4. Association of fried potato consumption and the risk of adiposity stratified by potential risk factors.** HRs for the fried potato consumption associated with obesity and abdominal obesity were adjusted for age, sex, race, centers, education, Townsend deprivation index, household income, smoking, alcohol consumption, physical activity, sleep pattern, energy intake, and BMI (for obesity) or WC (for abdominal obesity) at baseline.

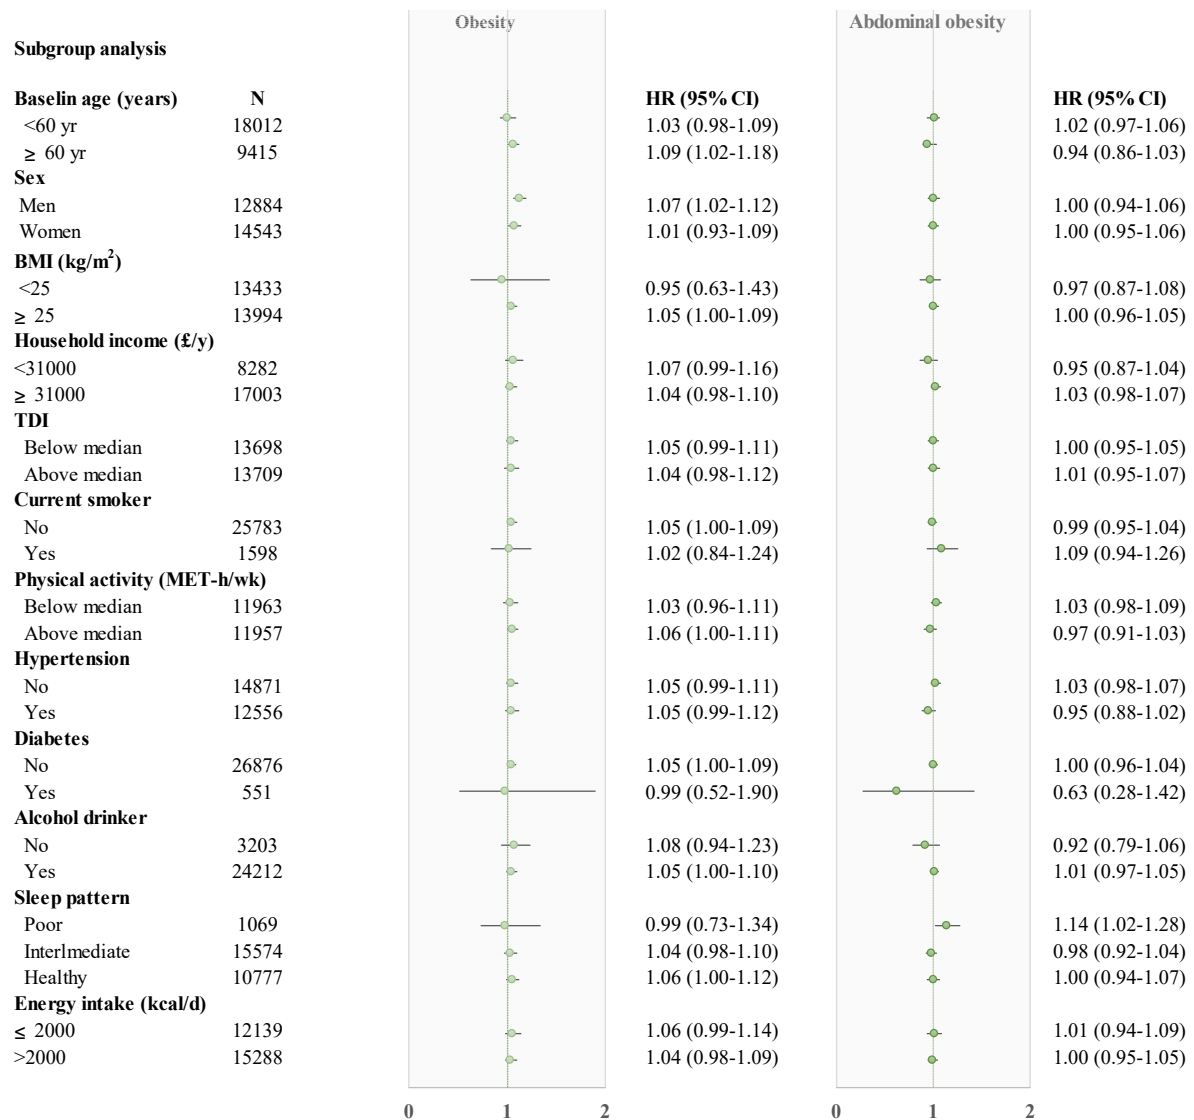

**Figure S5. Association of fried white meat consumption and the risk of adiposity stratified by potential risk factors.** HRs for the fried white meat consumption associated with obesity and abdominal obesity were adjusted for age, sex, race, centers, education, Townsend deprivation index, household income, smoking, alcohol consumption, physical activity, sleep pattern, energy intake, and BMI (for obesity) or WC (for abdominal obesity) at baseline.

**Table S1. Characteristics of 940 obesity-associated SNPs in the UK Biobank**

| SNP        | Chr | Position  | Effect allele | Other allele | EAF   | $\beta$ |
|------------|-----|-----------|---------------|--------------|-------|---------|
| rs10733051 | 1   | 167280354 | A             | G            | 0.520 | 0.010   |
| rs10754210 | 1   | 197012111 | A             | G            | 0.311 | -0.012  |
| rs10779751 | 1   | 11284336  | A             | G            | 0.274 | 0.014   |
| rs10915840 | 1   | 225668524 | A             | G            | 0.283 | -0.012  |
| rs10920678 | 1   | 190239907 | A             | G            | 0.429 | 0.016   |
| rs10923724 | 1   | 119546842 | T             | C            | 0.573 | -0.012  |
| rs11118308 | 1   | 219633869 | A             | G            | 0.530 | 0.010   |
| rs11208662 | 1   | 65987164  | C             | G            | 0.088 | 0.021   |
| rs11577179 | 1   | 155983710 | A             | G            | 0.372 | -0.011  |
| rs1158103  | 1   | 101024370 | A             | G            | 0.556 | -0.009  |
| rs11583122 | 1   | 38053458  | T             | C            | 0.079 | 0.018   |
| rs11590474 | 1   | 174972588 | T             | C            | 0.792 | -0.005  |
| rs11803119 | 1   | 174002465 | A             | T            | 0.018 | -0.001  |
| rs12033257 | 1   | 112318484 | A             | G            | 0.617 | 0.015   |
| rs12035149 | 1   | 107885018 | C             | G            | 0.777 | -0.015  |
| rs12035349 | 1   | 77557339  | A             | G            | 0.871 | -0.019  |
| rs12039524 | 1   | 173549827 | A             | G            | 0.175 | 0.001   |
| rs12041258 | 1   | 195047936 | T             | C            | 0.771 | 0.015   |
| rs12042908 | 1   | 74997762  | A             | G            | 0.436 | 0.018   |
| rs12042959 | 1   | 243533273 | A             | G            | 0.850 | 0.014   |
| rs12044597 | 1   | 1708801   | A             | G            | 0.497 | -0.014  |
| rs12564992 | 1   | 174478100 | A             | G            | 0.886 | -0.020  |
| rs12731372 | 1   | 118852975 | T             | C            | 0.232 | 0.012   |
| rs17014375 | 1   | 209543560 | T             | G            | 0.865 | -0.017  |
| rs17302346 | 1   | 174983543 | T             | C            | 0.976 | -0.020  |
| rs1730859  | 1   | 107617707 | A             | G            | 0.658 | -0.012  |
| rs17391694 | 1   | 78623626  | T             | C            | 0.119 | 0.032   |
| rs17448682 | 1   | 15966713  | T             | C            | 0.237 | 0.010   |
| rs17531363 | 1   | 107977075 | A             | C            | 0.697 | 0.013   |
| rs1973993  | 1   | 96943994  | T             | C            | 0.410 | -0.021  |
| rs2030342  | 1   | 97388226  | T             | C            | 0.575 | 0.014   |
| rs2154297  | 1   | 80791708  | T             | C            | 0.712 | -0.012  |
| rs2275426  | 1   | 46487552  | A             | G            | 0.434 | 0.010   |
| rs2282231  | 1   | 39569571  | T             | C            | 0.225 | 0.017   |
| rs2356865  | 1   | 50836334  | T             | C            | 0.295 | -0.011  |
| rs2481665  | 1   | 62594677  | T             | C            | 0.559 | 0.016   |
| rs2491864  | 1   | 242986063 | A             | G            | 0.215 | 0.014   |
| rs2590942  | 1   | 72885281  | T             | G            | 0.817 | 0.029   |
| rs2820311  | 1   | 201841476 | A             | G            | 0.663 | -0.024  |
| rs284227   | 1   | 82379446  | T             | C            | 0.745 | -0.015  |
| rs346722   | 1   | 45620134  | T             | C            | 0.115 | -0.003  |
| rs3753549  | 1   | 243722892 | T             | C            | 0.856 | -0.020  |

|            |   |           |   |   |       |        |
|------------|---|-----------|---|---|-------|--------|
| rs3762396  | 1 | 19510394  | A | G | 0.385 | 0.007  |
| rs3768486  | 1 | 110123971 | A | G | 0.824 | -0.010 |
| rs4372296  | 1 | 98320492  | A | C | 0.771 | -0.013 |
| rs4653017  | 1 | 33776728  | T | C | 0.682 | 0.012  |
| rs543874   | 1 | 177889480 | A | G | 0.805 | -0.048 |
| rs6577584  | 1 | 6715390   | T | G | 0.654 | -0.013 |
| rs6587552  | 1 | 151018861 | A | G | 0.241 | 0.017  |
| rs6681627  | 1 | 174126742 | A | C | 0.152 | 0.003  |
| rs6690764  | 1 | 92976590  | A | G | 0.792 | -0.015 |
| rs6700816  | 1 | 174883994 | A | T | 0.968 | 0.035  |
| rs6700838  | 1 | 47700027  | T | C | 0.596 | -0.017 |
| rs696606   | 1 | 16828640  | A | G | 0.524 | 0.010  |
| rs7531118  | 1 | 72837239  | T | C | 0.460 | -0.026 |
| rs7531656  | 1 | 49828663  | A | G | 0.325 | 0.020  |
| rs7535528  | 1 | 2444414   | A | G | 0.374 | -0.015 |
| rs7550711  | 1 | 110082886 | T | C | 0.031 | 0.065  |
| rs7556169  | 1 | 8741401   | A | G | 0.386 | -0.010 |
| rs761423   | 1 | 17301672  | T | C | 0.550 | 0.011  |
| rs785278   | 1 | 33307987  | A | T | 0.177 | -0.016 |
| rs823074   | 1 | 205774839 | T | C | 0.588 | 0.011  |
| rs905938   | 1 | 154991389 | T | C | 0.733 | -0.015 |
| rs9077     | 1 | 202116238 | A | G | 0.330 | -0.014 |
| rs912768   | 1 | 173473713 | C | G | 0.402 | 0.004  |
| rs9426003  | 1 | 34602870  | A | G | 0.295 | -0.012 |
| rs946526   | 1 | 46487168  | T | C | 0.043 | -0.031 |
| rs967605   | 1 | 23399932  | T | C | 0.833 | -0.019 |
| rs10168197 | 2 | 51834839  | C | G | 0.200 | -0.011 |
| rs10182181 | 2 | 25150296  | A | G | 0.525 | -0.033 |
| rs10190332 | 2 | 61619267  | T | G | 0.613 | 0.004  |
| rs10203277 | 2 | 103496700 | A | G | 0.132 | 0.004  |
| rs10211055 | 2 | 229016917 | T | C | 0.654 | -0.016 |
| rs10497807 | 2 | 198585087 | C | G | 0.520 | -0.011 |
| rs10929925 | 2 | 6155557   | A | C | 0.430 | -0.014 |
| rs10930641 | 2 | 175000711 | A | G | 0.591 | -0.014 |
| rs11889536 | 2 | 220163543 | A | G | 0.851 | 0.019  |
| rs12479233 | 2 | 228891702 | A | T | 0.487 | -0.012 |
| rs12615778 | 2 | 102436738 | A | G | 0.694 | 0.010  |
| rs12694021 | 2 | 206084372 | A | C | 0.448 | 0.011  |
| rs12713433 | 2 | 61307982  | T | C | 0.793 | 0.009  |
| rs12991989 | 2 | 199169278 | C | G | 0.519 | 0.004  |
| rs13021737 | 2 | 632348    | A | G | 0.168 | -0.057 |
| rs13417156 | 2 | 62848319  | T | C | 0.564 | -0.014 |
| rs13432055 | 2 | 56603985  | T | C | 0.714 | -0.012 |
| rs1371108  | 2 | 81816251  | A | C | 0.325 | 0.012  |



|            |   |           |   |   |       |        |
|------------|---|-----------|---|---|-------|--------|
| rs1437929  | 2 | 211983316 | A | G | 0.288 | 0.014  |
| rs1451533  | 2 | 105466005 | A | G | 0.273 | 0.017  |
| rs16828086 | 2 | 151198990 | C | G | 0.617 | 0.010  |
| rs17035438 | 2 | 46878616  | A | G | 0.094 | 0.020  |
| rs17203016 | 2 | 208255518 | A | G | 0.804 | -0.015 |
| rs17327461 | 2 | 35512183  | T | C | 0.450 | 0.013  |
| rs17551974 | 2 | 142293146 | A | C | 0.178 | -0.014 |
| rs2194385  | 2 | 50865334  | A | C | 0.479 | 0.009  |
| rs2724861  | 2 | 471514    | A | G | 0.565 | -0.009 |
| rs2890652  | 2 | 142959931 | T | C | 0.824 | -0.017 |
| rs2902021  | 2 | 67825685  | T | C | 0.194 | 0.014  |
| rs2974255  | 2 | 516696    | A | G | 0.229 | 0.009  |
| rs3922853  | 2 | 5830599   | A | C | 0.173 | 0.012  |
| rs4303732  | 2 | 100830040 | T | C | 0.603 | 0.014  |
| rs4372836  | 2 | 28973883  | T | C | 0.303 | 0.014  |
| rs453520   | 2 | 147907202 | T | C | 0.583 | -0.015 |
| rs4639527  | 2 | 416815    | A | G | 0.699 | -0.017 |
| rs4670626  | 2 | 37046657  | T | C | 0.357 | -0.011 |
| rs4671328  | 2 | 58935282  | T | G | 0.447 | 0.022  |
| rs4671358  | 2 | 60164634  | A | T | 0.596 | 0.010  |
| rs4673553  | 2 | 211608379 | T | G | 0.544 | -0.014 |
| rs4676084  | 2 | 110010962 | A | G | 0.410 | 0.010  |
| rs4854326  | 2 | 603088    | A | G | 0.713 | -0.002 |
| rs6545714  | 2 | 59307725  | A | G | 0.614 | -0.019 |
| rs6548221  | 2 | 295255    | A | G | 0.225 | 0.015  |
| rs6710871  | 2 | 143960593 | A | G | 0.142 | 0.018  |
| rs6711584  | 2 | 104421692 | A | G | 0.454 | 0.013  |
| rs6713781  | 2 | 40291940  | C | G | 0.414 | -0.012 |
| rs6720868  | 2 | 230663576 | T | C | 0.329 | 0.016  |
| rs6738445  | 2 | 172599615 | T | C | 0.284 | -0.013 |
| rs6753170  | 2 | 58481863  | T | C | 0.373 | -0.003 |
| rs7425440  | 2 | 512490    | T | C | 0.194 | 0.010  |
| rs7557796  | 2 | 86766153  | T | C | 0.348 | 0.016  |
| rs7560871  | 2 | 145616899 | A | G | 0.073 | 0.022  |
| rs7561278  | 2 | 48954905  | T | C | 0.786 | 0.016  |
| rs7564679  | 2 | 204012790 | A | G | 0.428 | -0.012 |
| rs7598402  | 2 | 50735943  | C | G | 0.510 | 0.012  |
| rs7599312  | 2 | 213413231 | A | G | 0.265 | -0.019 |
| rs7600699  | 2 | 156018263 | C | G | 0.842 | -0.015 |
| rs7601895  | 2 | 55281901  | C | G | 0.704 | 0.015  |
| rs7607351  | 2 | 69562127  | T | C | 0.581 | 0.012  |
| rs7607369  | 2 | 219279097 | A | G | 0.439 | 0.012  |
| rs7607490  | 2 | 12851120  | A | G | 0.108 | 0.015  |
| rs902695   | 2 | 113955074 | A | G | 0.480 | -0.010 |

|            |   |           |   |   |       |        |
|------------|---|-----------|---|---|-------|--------|
| rs919433   | 2 | 198166565 | A | G | 0.359 | 0.004  |
| rs929641   | 2 | 58792377  | A | G | 0.584 | 0.015  |
| rs930295   | 2 | 50233352  | A | C | 0.158 | 0.021  |
| rs934515   | 2 | 79482643  | A | G | 0.118 | 0.019  |
| rs9630985  | 2 | 181607676 | A | C | 0.324 | -0.018 |
| rs968972   | 2 | 51171962  | A | G | 0.641 | 0.009  |
| rs972540   | 2 | 207244783 | A | G | 0.727 | -0.013 |
| rs980329   | 2 | 60285100  | T | C | 0.752 | -0.013 |
| rs984902   | 2 | 81358877  | A | T | 0.885 | 0.011  |
| rs993954   | 2 | 188325474 | T | G | 0.572 | 0.008  |
| rs1014312  | 3 | 135621417 | C | G | 0.564 | 0.002  |
| rs10460960 | 3 | 42308735  | A | G | 0.888 | 0.020  |
| rs10510321 | 3 | 6009092   | T | C | 0.203 | 0.011  |
| rs10511093 | 3 | 83763541  | T | C | 0.074 | -0.023 |
| rs10865858 | 3 | 34700713  | T | C | 0.598 | 0.009  |
| rs10935143 | 3 | 134665159 | A | G | 0.454 | -0.011 |
| rs11128760 | 3 | 15873407  | A | G | 0.403 | 0.011  |
| rs11711337 | 3 | 21794904  | A | T | 0.716 | -0.010 |
| rs11915371 | 3 | 70539559  | A | C | 0.796 | -0.015 |
| rs11929028 | 3 | 51754424  | T | G | 0.075 | 0.017  |
| rs12488237 | 3 | 56114861  | T | C | 0.948 | -0.024 |
| rs12631248 | 3 | 50080174  | C | G | 0.922 | -0.025 |
| rs12637576 | 3 | 49237334  | T | C | 0.617 | 0.002  |
| rs12638746 | 3 | 89331055  | A | G | 0.342 | -0.009 |
| rs13072095 | 3 | 193639623 | T | C | 0.666 | 0.010  |
| rs13085472 | 3 | 171129859 | T | C | 0.348 | 0.010  |
| rs13095652 | 3 | 51243837  | T | C | 0.438 | -0.009 |
| rs1320903  | 3 | 131758077 | A | G | 0.317 | 0.022  |
| rs13321566 | 3 | 107342662 | A | G | 0.816 | -0.014 |
| rs1375561  | 3 | 85658230  | T | C | 0.654 | 0.017  |
| rs1436343  | 3 | 104606130 | A | G | 0.408 | -0.014 |
| rs1452075  | 3 | 62481063  | T | C | 0.728 | 0.014  |
| rs1454148  | 3 | 176341188 | T | C | 0.267 | 0.011  |
| rs1454687  | 3 | 94038085  | C | G | 0.477 | 0.020  |
| rs1554193  | 3 | 8138801   | A | T | 0.471 | -0.010 |
| rs1600136  | 3 | 136979939 | A | C | 0.806 | -0.008 |
| rs16823670 | 3 | 115071668 | A | G | 0.972 | 0.026  |
| rs16851483 | 3 | 141275436 | T | G | 0.069 | 0.037  |
| rs17080319 | 3 | 48732480  | T | C | 0.879 | 0.011  |
| rs17199978 | 3 | 136056184 | A | G | 0.903 | 0.003  |
| rs17681451 | 3 | 114399296 | A | G | 0.084 | -0.020 |
| rs181732   | 3 | 136744386 | T | G | 0.420 | -0.002 |
| rs1899951  | 3 | 12394840  | T | C | 0.131 | 0.017  |
| rs1909586  | 3 | 124687767 | T | G | 0.598 | -0.011 |

|           |   |           |   |   |       |        |
|-----------|---|-----------|---|---|-------|--------|
| rs2047632 | 3 | 37153431  | C | G | 0.973 | -0.025 |
| rs2122042 | 3 | 85866335  | T | G | 0.206 | 0.024  |
| rs2124499 | 3 | 123093541 | C | G | 0.372 | -0.012 |
| rs2230590 | 3 | 49936102  | T | C | 0.493 | -0.024 |
| rs2230929 | 3 | 49343175  | A | G | 0.169 | -0.005 |
| rs2236950 | 3 | 50420554  | A | C | 0.185 | -0.008 |
| rs2293605 | 3 | 184044433 | T | C | 0.131 | -0.017 |
| rs2365389 | 3 | 61236462  | T | C | 0.414 | -0.017 |
| rs262956  | 3 | 183486117 | T | G | 0.347 | 0.013  |
| rs2680648 | 3 | 53777176  | T | C | 0.765 | 0.016  |
| rs2710323 | 3 | 52815905  | T | C | 0.520 | -0.014 |
| rs28350   | 3 | 42418446  | A | G | 0.193 | 0.018  |
| rs355777  | 3 | 154034950 | C | G | 0.411 | 0.015  |
| rs3731544 | 3 | 48207997  | A | C | 0.071 | 0.021  |
| rs3772934 | 3 | 115417865 | T | C | 0.283 | 0.010  |
| rs3821841 | 3 | 52084040  | T | C | 0.080 | -0.016 |
| rs3849570 | 3 | 81792112  | A | C | 0.341 | 0.013  |
| rs3915844 | 3 | 9514856   | A | G | 0.143 | 0.015  |
| rs39654   | 3 | 173095123 | A | G | 0.445 | -0.015 |
| rs4273371 | 3 | 108119071 | T | C | 0.502 | -0.012 |
| rs4342060 | 3 | 137215820 | T | C | 0.809 | -0.005 |
| rs4624596 | 3 | 119571541 | T | C | 0.815 | 0.014  |
| rs4678297 | 3 | 136907111 | T | C | 0.300 | 0.004  |
| rs4858193 | 3 | 20441050  | T | C | 0.722 | 0.013  |
| rs5396    | 3 | 170744815 | T | C | 0.724 | -0.015 |
| rs580438  | 3 | 13345450  | T | C | 0.332 | 0.011  |
| rs6442021 | 3 | 46742019  | T | C | 0.396 | -0.009 |
| rs6442101 | 3 | 48130893  | T | C | 0.682 | -0.012 |
| rs6443750 | 3 | 181329682 | T | C | 0.193 | -0.015 |
| rs6551410 | 3 | 89442305  | A | T | 0.419 | 0.003  |
| rs6764533 | 3 | 196088464 | A | G | 0.359 | 0.012  |
| rs6767619 | 3 | 156893782 | C | G | 0.345 | 0.012  |
| rs6786125 | 3 | 28727523  | C | G | 0.819 | -0.012 |
| rs6786582 | 3 | 135898984 | T | C | 0.726 | -0.016 |
| rs6803870 | 3 | 89443784  | T | C | 0.159 | 0.008  |
| rs6804181 | 3 | 116937546 | A | T | 0.821 | 0.015  |
| rs6804842 | 3 | 25106437  | A | G | 0.428 | -0.016 |
| rs7615297 | 3 | 156299313 | C | G | 0.854 | 0.015  |
| rs7616371 | 3 | 137047387 | A | G | 0.932 | -0.002 |
| rs7640424 | 3 | 107820063 | T | C | 0.297 | -0.014 |
| rs775731  | 3 | 77624784  | T | C | 0.588 | -0.011 |
| rs827092  | 3 | 157985182 | T | C | 0.583 | 0.013  |
| rs925018  | 3 | 62713143  | C | G | 0.677 | -0.013 |
| rs9289499 | 3 | 135484734 | T | C | 0.897 | -0.003 |

|            |   |           |   |   |       |        |
|------------|---|-----------|---|---|-------|--------|
| rs9714342  | 3 | 90428286  | T | C | 0.423 | -0.015 |
| rs9809534  | 3 | 125189782 | C | G | 0.877 | 0.016  |
| rs9814633  | 3 | 41310470  | A | G | 0.343 | 0.012  |
| rs9816226  | 3 | 185834499 | A | T | 0.180 | -0.032 |
| rs9827072  | 3 | 51184893  | A | G | 0.124 | -0.011 |
| rs9832305  | 3 | 89392778  | T | C | 0.720 | -0.007 |
| rs9838283  | 3 | 50820486  | A | G | 0.798 | 0.016  |
| rs9846123  | 3 | 49088112  | T | C | 0.354 | -0.001 |
| rs9881036  | 3 | 136845666 | A | G | 0.665 | -0.004 |
| rs1000096  | 4 | 38692835  | T | C | 0.380 | -0.014 |
| rs10938397 | 4 | 45182527  | A | G | 0.568 | -0.032 |
| rs11736228 | 4 | 147376805 | A | T | 0.741 | 0.014  |
| rs11945861 | 4 | 65700865  | A | G | 0.237 | -0.015 |
| rs1296328  | 4 | 137083193 | A | C | 0.434 | 0.018  |
| rs13107325 | 4 | 103188709 | T | C | 0.074 | 0.047  |
| rs13110266 | 4 | 162129844 | A | G | 0.407 | -0.012 |
| rs1323068  | 4 | 20263058  | A | G | 0.321 | -0.011 |
| rs1345148  | 4 | 30843533  | T | C | 0.603 | -0.011 |
| rs1403846  | 4 | 119101723 | T | C | 0.828 | 0.012  |
| rs1455137  | 4 | 145986668 | A | C | 0.620 | -0.011 |
| rs1477887  | 4 | 18514827  | A | G | 0.457 | -0.014 |
| rs1492767  | 4 | 55221467  | T | C | 0.496 | 0.009  |
| rs1522569  | 4 | 171632637 | T | G | 0.818 | 0.016  |
| rs17538472 | 4 | 163038241 | T | C | 0.191 | 0.013  |
| rs1866510  | 4 | 44514468  | T | C | 0.350 | -0.011 |
| rs1903579  | 4 | 91253956  | C | G | 0.550 | 0.011  |
| rs2192158  | 4 | 55505360  | A | G | 0.460 | 0.013  |
| rs2768950  | 4 | 49064487  | A | G | 0.251 | 0.012  |
| rs2850969  | 4 | 102183594 | T | C | 0.857 | -0.017 |
| rs326889   | 4 | 112713436 | T | C | 0.393 | -0.013 |
| rs331949   | 4 | 143663206 | T | C | 0.627 | -0.011 |
| rs4148155  | 4 | 89054667  | A | G | 0.887 | 0.019  |
| rs4524456  | 4 | 6492739   | A | G | 0.524 | -0.009 |
| rs4864201  | 4 | 130731284 | T | C | 0.353 | 0.014  |
| rs6448587  | 4 | 28561990  | A | C | 0.811 | 0.017  |
| rs6818414  | 4 | 16600664  | T | C | 0.508 | -0.010 |
| rs6827083  | 4 | 153075491 | A | G | 0.569 | -0.010 |
| rs6843738  | 4 | 103936001 | A | G | 0.329 | -0.011 |
| rs711347   | 4 | 52926216  | A | T | 0.749 | -0.012 |
| rs7377083  | 4 | 102708997 | A | C | 0.436 | 0.020  |
| rs7674623  | 4 | 80794681  | T | C | 0.198 | 0.014  |
| rs7683836  | 4 | 180167906 | A | G | 0.541 | -0.011 |
| rs7692088  | 4 | 10491040  | C | G | 0.525 | 0.007  |
| rs7694732  | 4 | 115124089 | A | G | 0.562 | 0.010  |

|            |   |           |   |   |       |        |
|------------|---|-----------|---|---|-------|--------|
| rs769674   | 4 | 140881964 | A | T | 0.678 | 0.014  |
| rs925421   | 4 | 60253877  | A | G | 0.266 | 0.012  |
| rs9291467  | 4 | 25428296  | T | C | 0.463 | 0.014  |
| rs10035289 | 5 | 153095918 | A | G | 0.474 | 0.009  |
| rs10037047 | 5 | 88219964  | A | G | 0.835 | -0.006 |
| rs10066835 | 5 | 151254297 | T | C | 0.016 | 0.043  |
| rs1014194  | 5 | 168192944 | A | C | 0.643 | 0.010  |
| rs12189178 | 5 | 50914726  | T | C | 0.038 | 0.036  |
| rs12514473 | 5 | 80818639  | T | C | 0.769 | 0.017  |
| rs12655756 | 5 | 88858208  | A | T | 0.370 | 0.014  |
| rs12659802 | 5 | 152274478 | A | G | 0.705 | 0.009  |
| rs13163306 | 5 | 136571959 | A | G | 0.475 | -0.009 |
| rs13174863 | 5 | 139080745 | A | G | 0.845 | -0.019 |
| rs13175892 | 5 | 87866793  | T | C | 0.976 | -0.022 |
| rs1423627  | 5 | 87125578  | T | C | 0.779 | 0.006  |
| rs159032   | 5 | 94206202  | T | C | 0.244 | 0.013  |
| rs160401   | 5 | 138061341 | T | C | 0.695 | 0.006  |
| rs1650586  | 5 | 157516393 | T | G | 0.098 | 0.013  |
| rs17056301 | 5 | 158271680 | T | C | 0.736 | -0.012 |
| rs17285919 | 5 | 86908920  | T | C | 0.126 | 0.000  |
| rs174415   | 5 | 95933162  | A | T | 0.525 | 0.000  |
| rs17525725 | 5 | 167293652 | A | G | 0.454 | -0.008 |
| rs17591778 | 5 | 86420392  | A | G | 0.233 | 0.008  |
| rs186543   | 5 | 86754835  | C | G | 0.565 | -0.008 |
| rs2098618  | 5 | 87934851  | A | T | 0.071 | -0.010 |
| rs2190788  | 5 | 144484261 | T | G | 0.311 | 0.014  |
| rs2304607  | 5 | 87988733  | A | G | 0.852 | -0.032 |
| rs2307111  | 5 | 75003678  | T | C | 0.604 | 0.027  |
| rs2367112  | 5 | 64168193  | T | G | 0.508 | 0.012  |
| rs248139   | 5 | 167352783 | A | G | 0.193 | 0.013  |
| rs254428   | 5 | 141777439 | T | G | 0.580 | 0.008  |
| rs25832    | 5 | 66175682  | A | G | 0.732 | 0.012  |
| rs2611742  | 5 | 95856501  | T | C | 0.596 | -0.015 |
| rs329124   | 5 | 133865452 | A | G | 0.577 | 0.013  |
| rs368863   | 5 | 77372852  | T | C | 0.239 | -0.012 |
| rs3822683  | 5 | 96080883  | A | G | 0.781 | 0.015  |
| rs3844598  | 5 | 140992235 | A | G | 0.479 | -0.010 |
| rs40067    | 5 | 107439012 | A | G | 0.171 | -0.027 |
| rs4518345  | 5 | 27185904  | A | G | 0.284 | -0.012 |
| rs4643949  | 5 | 138372345 | T | C | 0.367 | 0.000  |
| rs4916661  | 5 | 87932809  | T | G | 0.362 | -0.003 |
| rs6235     | 5 | 95728898  | C | G | 0.730 | -0.018 |
| rs6449531  | 5 | 60712212  | A | G | 0.354 | -0.013 |
| rs6595205  | 5 | 119372533 | C | G | 0.470 | 0.011  |

|            |   |           |   |   |       |        |
|------------|---|-----------|---|---|-------|--------|
| rs6877851  | 5 | 130356413 | C | G | 0.235 | -0.013 |
| rs6879326  | 5 | 59208302  | T | C | 0.495 | -0.010 |
| rs6888159  | 5 | 63932234  | C | G | 0.683 | 0.011  |
| rs710355   | 5 | 87159003  | C | G | 0.055 | -0.007 |
| rs7444298  | 5 | 87730027  | A | G | 0.754 | 0.018  |
| rs7702514  | 5 | 86727027  | T | C | 0.173 | -0.002 |
| rs7710595  | 5 | 106506697 | A | C | 0.534 | 0.010  |
| rs7711753  | 5 | 122733317 | A | G | 0.436 | -0.013 |
| rs7715256  | 5 | 153537893 | T | G | 0.578 | -0.017 |
| rs7716275  | 5 | 137631073 | T | G | 0.193 | -0.013 |
| rs7727781  | 5 | 165185571 | T | C | 0.521 | 0.010  |
| rs7730004  | 5 | 43191033  | T | C | 0.669 | 0.015  |
| rs7730898  | 5 | 170459675 | A | G | 0.729 | 0.017  |
| rs1020548  | 6 | 56810539  | A | G | 0.834 | -0.013 |
| rs10456637 | 6 | 50763935  | A | T | 0.741 | 0.013  |
| rs10499276 | 6 | 154309808 | T | C | 0.124 | 0.017  |
| rs11753081 | 6 | 20705590  | T | G | 0.825 | 0.014  |
| rs11756653 | 6 | 50054296  | C | G | 0.907 | -0.005 |
| rs1178060  | 6 | 50914343  | A | G | 0.847 | 0.019  |
| rs12207241 | 6 | 57642076  | A | G | 0.617 | -0.008 |
| rs12215331 | 6 | 34644749  | T | C | 0.786 | 0.018  |
| rs1266922  | 6 | 51822297  | A | G | 0.688 | 0.001  |
| rs13191362 | 6 | 163033350 | A | G | 0.880 | 0.024  |
| rs13201877 | 6 | 137675541 | A | G | 0.860 | -0.015 |
| rs13203153 | 6 | 97374850  | A | G | 0.186 | -0.012 |
| rs13203286 | 6 | 49837540  | T | G | 0.060 | -0.005 |
| rs13207082 | 6 | 27251379  | A | G | 0.916 | -0.012 |
| rs13209753 | 6 | 86354442  | A | G | 0.939 | -0.018 |
| rs13209872 | 6 | 97753223  | C | G | 0.340 | -0.015 |
| rs13209968 | 6 | 126089285 | C | G | 0.518 | 0.011  |
| rs1324110  | 6 | 93913200  | C | G | 0.439 | -0.010 |
| rs1358808  | 6 | 51825285  | C | G | 0.674 | -0.014 |
| rs1475774  | 6 | 35619554  | A | G | 0.023 | 0.026  |
| rs1503139  | 6 | 54724405  | A | G | 0.346 | -0.006 |
| rs156151   | 6 | 104799007 | C | G | 0.191 | -0.017 |
| rs17542466 | 6 | 35614744  | A | G | 0.772 | 0.005  |
| rs17739298 | 6 | 27293049  | C | G | 0.895 | 0.010  |
| rs17757975 | 6 | 38214150  | T | C | 0.852 | 0.014  |
| rs1853639  | 6 | 87606842  | A | G | 0.636 | -0.011 |
| rs200968   | 6 | 27859568  | T | C | 0.836 | -0.003 |
| rs2033529  | 6 | 40348653  | A | G | 0.706 | -0.021 |
| rs2140418  | 6 | 34975415  | T | C | 0.200 | 0.011  |
| rs2185027  | 6 | 153381622 | A | C | 0.703 | -0.014 |
| rs2228213  | 6 | 12124855  | A | G | 0.348 | -0.014 |

|           |   |           |   |   |       |        |
|-----------|---|-----------|---|---|-------|--------|
| rs2252300 | 6 | 51096424  | A | T | 0.208 | -0.005 |
| rs2295896 | 6 | 50566383  | A | G | 0.760 | -0.002 |
| rs2357760 | 6 | 120213880 | A | G | 0.675 | 0.015  |
| rs2397061 | 6 | 51638877  | T | C | 0.885 | -0.009 |
| rs2504674 | 6 | 51160682  | C | G | 0.434 | -0.011 |
| rs2635727 | 6 | 50820940  | T | C | 0.254 | -0.028 |
| rs2653365 | 6 | 55169801  | T | C | 0.832 | -0.012 |
| rs2781668 | 6 | 131897278 | T | C | 0.161 | 0.017  |
| rs2814992 | 6 | 34617144  | A | G | 0.660 | -0.025 |
| rs2842385 | 6 | 19078274  | A | G | 0.802 | -0.012 |
| rs2875762 | 6 | 124925032 | C | G | 0.247 | 0.014  |
| rs3734572 | 6 | 28059458  | T | C | 0.954 | -0.017 |
| rs3800229 | 6 | 108996963 | T | G | 0.712 | 0.018  |
| rs3807049 | 6 | 35512955  | T | C | 0.274 | -0.004 |
| rs3819299 | 6 | 31322367  | T | G | 0.907 | 0.019  |
| rs419261  | 6 | 33554147  | T | C | 0.404 | 0.011  |
| rs4278019 | 6 | 53693410  | A | T | 0.282 | 0.011  |
| rs4339513 | 6 | 57964315  | T | C | 0.903 | -0.002 |
| rs4383818 | 6 | 50756951  | T | G | 0.795 | 0.009  |
| rs487060  | 6 | 160774459 | T | C | 0.482 | 0.011  |
| rs498240  | 6 | 31892592  | A | G | 0.066 | -0.027 |
| rs6459326 | 6 | 58060143  | C | G | 0.173 | 0.001  |
| rs6569648 | 6 | 130349119 | T | C | 0.773 | -0.013 |
| rs6900723 | 6 | 23876240  | T | C | 0.676 | -0.011 |
| rs6904676 | 6 | 58705746  | A | C | 0.201 | 0.008  |
| rs6908295 | 6 | 27527205  | A | C | 0.798 | -0.006 |
| rs6919443 | 6 | 104493098 | A | G | 0.416 | -0.010 |
| rs6921533 | 6 | 73742334  | T | C | 0.288 | 0.012  |
| rs6922214 | 6 | 69968484  | A | G | 0.843 | -0.012 |
| rs6922855 | 6 | 51843542  | A | G | 0.532 | 0.000  |
| rs6938239 | 6 | 34683635  | A | G | 0.850 | -0.027 |
| rs760880  | 6 | 27408181  | T | G | 0.636 | -0.003 |
| rs765332  | 6 | 51874745  | T | G | 0.889 | -0.012 |
| rs7748777 | 6 | 41133806  | A | G | 0.459 | 0.011  |
| rs7760082 | 6 | 21919387  | A | G | 0.665 | -0.012 |
| rs816364  | 6 | 53990465  | A | G | 0.639 | -0.010 |
| rs820077  | 6 | 35033854  | A | G | 0.809 | -0.006 |
| rs847747  | 6 | 40080069  | T | G | 0.296 | -0.011 |
| rs853679  | 6 | 28296863  | A | C | 0.141 | 0.013  |
| rs901630  | 6 | 98539519  | T | C | 0.397 | -0.015 |
| rs926279  | 6 | 58298846  | A | G | 0.709 | -0.004 |
| rs9294260 | 6 | 83433228  | A | G | 0.473 | 0.015  |
| rs9349239 | 6 | 42676480  | A | G | 0.492 | 0.012  |
| rs9362662 | 6 | 90296588  | A | G | 0.480 | 0.011  |

|            |   |           |   |   |       |        |
|------------|---|-----------|---|---|-------|--------|
| rs9367368  | 6 | 13189275  | T | C | 0.697 | 0.012  |
| rs9370042  | 6 | 51546123  | C | G | 0.122 | 0.004  |
| rs9394312  | 6 | 35672330  | C | G | 0.492 | 0.011  |
| rs9396763  | 6 | 9952059   | A | C | 0.220 | 0.009  |
| rs9460306  | 6 | 19211776  | T | C | 0.091 | 0.014  |
| rs9463175  | 6 | 9510030   | T | C | 0.348 | -0.011 |
| rs9470086  | 6 | 35709678  | A | C | 0.017 | 0.024  |
| rs9475173  | 6 | 55013291  | A | G | 0.654 | 0.011  |
| rs9688431  | 6 | 73922654  | T | C | 0.940 | 0.023  |
| rs987237   | 6 | 50803050  | A | G | 0.820 | -0.041 |
| rs998584   | 6 | 43757896  | A | C | 0.478 | -0.013 |
| rs10268050 | 7 | 44522617  | T | C | 0.795 | -0.011 |
| rs10269783 | 7 | 49616203  | A | G | 0.390 | 0.013  |
| rs10275044 | 7 | 1273845   | A | T | 0.208 | -0.013 |
| rs1035010  | 7 | 69598328  | T | C | 0.257 | 0.014  |
| rs1048365  | 7 | 100804430 | T | C | 0.155 | 0.014  |
| rs10953620 | 7 | 109173373 | A | C | 0.517 | -0.010 |
| rs11496125 | 7 | 103417557 | T | C | 0.421 | 0.017  |
| rs11773362 | 7 | 147668180 | T | C | 0.337 | -0.011 |
| rs11971041 | 7 | 26698848  | A | G | 0.906 | -0.021 |
| rs1229057  | 7 | 39054538  | T | C | 0.122 | 0.017  |
| rs12666574 | 7 | 26526960  | A | G | 0.651 | 0.010  |
| rs12705987 | 7 | 114349212 | A | T | 0.404 | 0.014  |
| rs13227433 | 7 | 74094721  | T | G | 0.744 | -0.016 |
| rs13227658 | 7 | 113353254 | T | C | 0.553 | -0.016 |
| rs13240600 | 7 | 99064466  | A | G | 0.845 | 0.020  |
| rs13247665 | 7 | 93232057  | T | C | 0.641 | -0.014 |
| rs1544459  | 7 | 77417584  | T | C | 0.546 | -0.010 |
| rs1593304  | 7 | 131619847 | A | G | 0.199 | 0.013  |
| rs17207196 | 7 | 75101065  | T | C | 0.412 | -0.022 |
| rs1814170  | 7 | 138794149 | A | T | 0.895 | 0.020  |
| rs1852006  | 7 | 77829768  | A | G | 0.352 | -0.016 |
| rs1899689  | 7 | 121964349 | T | C | 0.399 | 0.012  |
| rs215632   | 7 | 32368524  | A | G | 0.362 | 0.015  |
| rs2283093  | 7 | 126721231 | T | C | 0.207 | 0.013  |
| rs329277   | 7 | 35080931  | T | G | 0.521 | -0.010 |
| rs3800649  | 7 | 137424509 | A | G | 0.277 | 0.012  |
| rs3807566  | 7 | 50564204  | T | G | 0.443 | -0.013 |
| rs40245    | 7 | 21470536  | A | T | 0.359 | 0.011  |
| rs411717   | 7 | 94033031  | T | C | 0.440 | -0.007 |
| rs4307239  | 7 | 24354300  | A | G | 0.542 | -0.012 |
| rs4718966  | 7 | 70040558  | T | C | 0.418 | 0.013  |
| rs4722398  | 7 | 3125220   | T | C | 0.134 | 0.016  |
| rs4722672  | 7 | 27231762  | T | C | 0.815 | -0.015 |



|            |   |           |   |   |       |        |
|------------|---|-----------|---|---|-------|--------|
| rs4725984  | 7 | 150668514 | T | C | 0.359 | -0.013 |
| rs6461115  | 7 | 2103668   | A | G | 0.772 | 0.014  |
| rs6463489  | 7 | 5542513   | T | C | 0.109 | 0.016  |
| rs6963840  | 7 | 78144371  | T | C | 0.211 | 0.015  |
| rs6968554  | 7 | 17287106  | A | G | 0.360 | -0.010 |
| rs740157   | 7 | 77055885  | A | G | 0.432 | 0.012  |
| rs7777102  | 7 | 73058017  | A | G | 0.871 | -0.013 |
| rs7779498  | 7 | 130408415 | T | C | 0.039 | -0.025 |
| rs7784465  | 7 | 6418275   | T | C | 0.861 | -0.016 |
| rs7796608  | 7 | 897847    | A | G | 0.827 | 0.012  |
| rs7805441  | 7 | 78121458  | T | C | 0.509 | 0.011  |
| rs799449   | 7 | 44784697  | T | C | 0.551 | 0.013  |
| rs849135   | 7 | 28196413  | A | G | 0.491 | 0.011  |
| rs874454   | 7 | 131896813 | A | G | 0.338 | -0.008 |
| rs972283   | 7 | 130466854 | A | G | 0.485 | 0.010  |
| rs993931   | 7 | 71888157  | A | G | 0.599 | -0.006 |
| rs10110727 | 8 | 14324437  | A | G | 0.293 | 0.014  |
| rs10955841 | 8 | 118946541 | A | G | 0.669 | 0.010  |
| rs11250076 | 8 | 10647823  | A | G | 0.439 | 0.018  |
| rs11781222 | 8 | 23389571  | T | C | 0.871 | 0.016  |
| rs11781699 | 8 | 118863061 | T | C | 0.810 | -0.013 |
| rs11783247 | 8 | 10788875  | T | C | 0.538 | -0.017 |
| rs11987383 | 8 | 15197115  | A | C | 0.880 | -0.015 |
| rs12458    | 8 | 11617240  | A | T | 0.687 | 0.002  |
| rs12675063 | 8 | 132879047 | A | T | 0.887 | -0.016 |
| rs12680842 | 8 | 95582606  | A | G | 0.680 | 0.013  |
| rs12682565 | 8 | 10626280  | A | G | 0.037 | 0.023  |
| rs13263601 | 8 | 14095900  | A | C | 0.652 | -0.015 |
| rs1362910  | 8 | 30856464  | A | G | 0.419 | 0.012  |
| rs1394     | 8 | 9511654   | A | G | 0.640 | -0.015 |
| rs1399054  | 8 | 9785503   | A | G | 0.799 | -0.010 |
| rs1405348  | 8 | 77228222  | A | G | 0.432 | -0.020 |
| rs1431659  | 8 | 73439070  | A | G | 0.266 | 0.020  |
| rs1594830  | 8 | 26334167  | C | G | 0.788 | -0.011 |
| rs1658820  | 8 | 4288577   | T | G | 0.247 | 0.014  |
| rs16906845 | 8 | 138215228 | A | G | 0.067 | -0.023 |
| rs16907751 | 8 | 81375457  | T | C | 0.105 | -0.021 |
| rs16932761 | 8 | 67202787  | A | G | 0.254 | -0.014 |
| rs1700137  | 8 | 89461609  | T | C | 0.312 | -0.012 |
| rs17069831 | 8 | 4137396   | T | C | 0.280 | -0.011 |
| rs17446091 | 8 | 27167942  | T | C | 0.793 | -0.012 |
| rs1982441  | 8 | 28021769  | T | G | 0.138 | 0.018  |
| rs2100814  | 8 | 28118130  | A | G | 0.410 | 0.011  |
| rs2170382  | 8 | 74689288  | T | C | 0.120 | 0.017  |

|            |   |           |   |   |       |        |
|------------|---|-----------|---|---|-------|--------|
| rs2409730  | 8 | 11060638  | A | C | 0.370 | -0.009 |
| rs2543132  | 8 | 15536311  | C | G | 0.813 | 0.015  |
| rs2634047  | 8 | 85696337  | C | G | 0.242 | -0.015 |
| rs2721965  | 8 | 116662038 | A | C | 0.667 | 0.017  |
| rs3134353  | 8 | 101947453 | A | T | 0.387 | -0.013 |
| rs3808434  | 8 | 116559435 | A | G | 0.448 | 0.011  |
| rs4076358  | 8 | 144910239 | A | G | 0.621 | 0.009  |
| rs4366093  | 8 | 20639811  | T | C | 0.320 | -0.012 |
| rs4737183  | 8 | 64720693  | A | G | 0.530 | 0.011  |
| rs4841659  | 8 | 11828200  | T | C | 0.479 | 0.015  |
| rs497417   | 8 | 9790041   | A | T | 0.786 | -0.005 |
| rs7006629  | 8 | 87519542  | T | C | 0.526 | 0.011  |
| rs733594   | 8 | 85077686  | T | C | 0.718 | 0.014  |
| rs7827182  | 8 | 8380471   | C | G | 0.495 | 0.018  |
| rs7832003  | 8 | 10782004  | C | G | 0.180 | -0.006 |
| rs7844647  | 8 | 34503776  | T | C | 0.732 | 0.012  |
| rs881301   | 8 | 38332318  | T | C | 0.582 | -0.010 |
| rs903959   | 8 | 142630782 | A | T | 0.397 | 0.011  |
| rs9657542  | 8 | 10864363  | C | G | 0.364 | -0.005 |
| rs10118701 | 9 | 103061366 | A | G | 0.677 | -0.016 |
| rs10797115 | 9 | 92191256  | T | C | 0.537 | 0.012  |
| rs10818810 | 9 | 126096522 | A | G | 0.391 | 0.013  |
| rs10818938 | 9 | 127049237 | A | G | 0.422 | 0.011  |
| rs10867256 | 9 | 81367391  | T | C | 0.553 | -0.012 |
| rs10962549 | 9 | 16719445  | T | C | 0.168 | 0.020  |
| rs10971712 | 9 | 33820938  | T | C | 0.108 | -0.020 |
| rs10989568 | 9 | 104396304 | A | G | 0.462 | 0.011  |
| rs11790280 | 9 | 14651283  | T | C | 0.614 | -0.010 |
| rs13290794 | 9 | 37183628  | A | G | 0.358 | -0.014 |
| rs13292976 | 9 | 129467340 | T | C | 0.446 | 0.013  |
| rs1412235  | 9 | 28410996  | C | G | 0.318 | 0.025  |
| rs17351791 | 9 | 83263089  | A | C | 0.635 | 0.010  |
| rs17820822 | 9 | 11831420  | T | G | 0.645 | 0.014  |
| rs1865341  | 9 | 8845911   | T | C | 0.758 | 0.013  |
| rs1928295  | 9 | 120378483 | T | C | 0.554 | 0.014  |
| rs2174307  | 9 | 73791849  | C | G | 0.407 | 0.012  |
| rs3739555  | 9 | 129940416 | T | G | 0.807 | 0.011  |
| rs3739733  | 9 | 88897891  | A | G | 0.780 | 0.013  |
| rs3829849  | 9 | 129390800 | T | C | 0.359 | 0.010  |
| rs3902840  | 9 | 129419025 | A | G | 0.086 | 0.022  |
| rs450231   | 9 | 101481205 | A | G | 0.753 | -0.013 |
| rs4515655  | 9 | 128616073 | T | C | 0.401 | -0.007 |
| rs4740383  | 9 | 133783566 | A | G | 0.416 | 0.013  |
| rs4744275  | 9 | 96482633  | A | G | 0.266 | 0.014  |

|            |    |           |   |   |       |        |
|------------|----|-----------|---|---|-------|--------|
| rs483752   | 9  | 27612918  | T | C | 0.742 | 0.012  |
| rs6474945  | 9  | 15670492  | T | G | 0.450 | -0.019 |
| rs6477694  | 9  | 111932342 | T | C | 0.644 | -0.012 |
| rs7024334  | 9  | 109072075 | T | G | 0.226 | 0.014  |
| rs7042372  | 9  | 6959840   | A | G | 0.657 | 0.012  |
| rs7865157  | 9  | 122631560 | T | C | 0.107 | 0.018  |
| rs7869771  | 9  | 94180627  | A | C | 0.735 | 0.014  |
| rs7871866  | 9  | 131027982 | C | G | 0.153 | 0.019  |
| rs7874154  | 9  | 27777012  | T | C | 0.502 | -0.013 |
| rs10883553 | 10 | 102635475 | A | C | 0.451 | 0.012  |
| rs10883759 | 10 | 104412049 | A | G | 0.302 | -0.012 |
| rs10886017 | 10 | 118672531 | A | C | 0.252 | 0.015  |
| rs10887578 | 10 | 88096047  | C | G | 0.490 | 0.013  |
| rs11190661 | 10 | 102452136 | T | C | 0.315 | 0.001  |
| rs11251352 | 10 | 2585792   | A | G | 0.401 | -0.011 |
| rs12098284 | 10 | 76047464  | T | C | 0.124 | 0.018  |
| rs12411886 | 10 | 104685299 | A | C | 0.083 | 0.027  |
| rs12776880 | 10 | 19776828  | A | T | 0.683 | 0.013  |
| rs17094222 | 10 | 102395440 | T | C | 0.796 | -0.018 |
| rs1712517  | 10 | 105033015 | T | C | 0.468 | -0.003 |
| rs17636031 | 10 | 126594078 | T | C | 0.730 | -0.016 |
| rs1937684  | 10 | 53680085  | A | T | 0.659 | 0.011  |
| rs1983864  | 10 | 100017453 | T | G | 0.667 | 0.016  |
| rs2163188  | 10 | 65314711  | C | G | 0.474 | 0.013  |
| rs2631681  | 10 | 93032943  | T | C | 0.325 | -0.011 |
| rs3781099  | 10 | 27318776  | T | C | 0.082 | 0.021  |
| rs3851083  | 10 | 33862727  | A | G | 0.433 | -0.010 |
| rs577525   | 10 | 99769388  | T | C | 0.432 | -0.017 |
| rs7083450  | 10 | 103984060 | T | C | 0.839 | 0.016  |
| rs7084454  | 10 | 21821274  | A | G | 0.335 | 0.019  |
| rs7893571  | 10 | 16750129  | T | G | 0.662 | 0.014  |
| rs7899106  | 10 | 87410904  | A | G | 0.952 | -0.033 |
| rs7903146  | 10 | 114758349 | T | C | 0.291 | -0.018 |
| rs793520   | 10 | 99032375  | A | G | 0.323 | 0.011  |
| rs845084   | 10 | 125220036 | A | G | 0.268 | 0.014  |
| rs9419958  | 10 | 105675946 | T | C | 0.136 | -0.013 |
| rs9787495  | 10 | 103206115 | A | G | 0.437 | -0.010 |
| rs1003081  | 11 | 118913993 | T | C | 0.450 | 0.012  |
| rs1037587  | 11 | 11796727  | T | C | 0.454 | 0.011  |
| rs10459012 | 11 | 55091574  | A | C | 0.224 | 0.008  |
| rs1048932  | 11 | 115044850 | A | C | 0.416 | -0.016 |
| rs10769165 | 11 | 45706453  | T | C | 0.523 | -0.007 |
| rs10830452 | 11 | 89966202  | A | G | 0.671 | -0.011 |
| rs10832778 | 11 | 17394073  | C | G | 0.378 | -0.013 |

|            |    |           |   |   |       |        |
|------------|----|-----------|---|---|-------|--------|
| rs10838122 | 11 | 43551416  | T | C | 0.480 | -0.011 |
| rs10838852 | 11 | 48286256  | T | C | 0.563 | 0.005  |
| rs10839472 | 11 | 49994823  | T | C | 0.766 | 0.004  |
| rs10840606 | 11 | 2234690   | A | G | 0.826 | -0.016 |
| rs11030385 | 11 | 28629115  | A | G | 0.395 | -0.008 |
| rs11039014 | 11 | 46895378  | A | G | 0.774 | 0.000  |
| rs11231548 | 11 | 55686588  | A | G | 0.987 | -0.028 |
| rs11600990 | 11 | 64082807  | T | C | 0.157 | -0.018 |
| rs12364470 | 11 | 134601012 | T | G | 0.837 | -0.018 |
| rs12417072 | 11 | 115623272 | A | G | 0.885 | -0.015 |
| rs12420725 | 11 | 117017530 | A | G | 0.941 | -0.023 |
| rs12574668 | 11 | 46422686  | A | C | 0.179 | 0.013  |
| rs12575252 | 11 | 8694073   | C | G | 0.351 | -0.018 |
| rs12577642 | 11 | 43728534  | A | T | 0.686 | -0.021 |
| rs1452134  | 11 | 86133416  | T | C | 0.542 | -0.009 |
| rs1473579  | 11 | 48901553  | A | G | 0.412 | -0.003 |
| rs1552717  | 11 | 29158495  | A | T | 0.865 | 0.015  |
| rs1625427  | 11 | 131957293 | T | C | 0.650 | 0.013  |
| rs17197116 | 11 | 46520302  | T | C | 0.914 | -0.005 |
| rs1782507  | 11 | 30243868  | T | G | 0.653 | -0.014 |
| rs1789165  | 11 | 69481969  | A | G | 0.639 | 0.014  |
| rs1943477  | 11 | 56973793  | T | C | 0.058 | -0.020 |
| rs223051   | 11 | 32131303  | T | C | 0.676 | 0.011  |
| rs2440885  | 11 | 70563286  | A | G | 0.533 | 0.009  |
| rs2605603  | 11 | 93221105  | A | G | 0.489 | -0.010 |
| rs2612203  | 11 | 54914689  | A | G | 0.035 | 0.016  |
| rs3134438  | 11 | 122765667 | A | C | 0.286 | 0.011  |
| rs329651   | 11 | 133767622 | T | G | 0.806 | 0.016  |
| rs3802924  | 11 | 133827733 | A | C | 0.800 | 0.009  |
| rs4542429  | 11 | 56446833  | T | C | 0.484 | -0.006 |
| rs4936175  | 11 | 132641959 | T | C | 0.556 | -0.012 |
| rs4936671  | 11 | 121942512 | C | G | 0.367 | 0.011  |
| rs4939051  | 11 | 56206141  | C | G | 0.789 | -0.001 |
| rs524281   | 11 | 65886662  | A | C | 0.759 | -0.009 |
| rs551137   | 11 | 55323307  | T | C | 0.256 | 0.004  |
| rs573455   | 11 | 117267884 | A | G | 0.453 | -0.009 |
| rs587230   | 11 | 69299771  | A | G | 0.165 | 0.015  |
| rs6265     | 11 | 27679916  | T | C | 0.195 | -0.041 |
| rs7102454  | 11 | 65594820  | T | C | 0.657 | -0.016 |
| rs7117238  | 11 | 78040259  | A | G | 0.168 | -0.013 |
| rs7120873  | 11 | 49459474  | T | C | 0.111 | 0.017  |
| rs7122539  | 11 | 66662731  | A | G | 0.342 | -0.007 |
| rs7123876  | 11 | 72444583  | T | C | 0.754 | -0.012 |
| rs7124442  | 11 | 27677041  | T | C | 0.683 | -0.029 |

|            |    |           |   |   |       |        |
|------------|----|-----------|---|---|-------|--------|
| rs7124681  | 11 | 47529947  | A | C | 0.413 | 0.026  |
| rs7131262  | 11 | 47836302  | A | T | 0.261 | -0.022 |
| rs719802   | 11 | 113234679 | T | C | 0.380 | 0.010  |
| rs7478904  | 11 | 48630323  | T | C | 0.128 | -0.009 |
| rs7924371  | 11 | 49620595  | T | C | 0.557 | -0.004 |
| rs7941030  | 11 | 122522375 | T | C | 0.614 | -0.011 |
| rs7948120  | 11 | 28763321  | T | C | 0.260 | -0.013 |
| rs900144   | 11 | 13294268  | T | C | 0.567 | 0.017  |
| rs9332817  | 11 | 118365210 | C | G | 0.026 | -0.038 |
| rs10744146 | 12 | 17212881  | A | G | 0.515 | -0.012 |
| rs10745785 | 12 | 97586257  | T | C | 0.667 | -0.011 |
| rs10772055 | 12 | 33379440  | C | G | 0.866 | -0.017 |
| rs10773049 | 12 | 124506631 | T | C | 0.598 | -0.012 |
| rs10840674 | 12 | 17360254  | A | G | 0.694 | -0.009 |
| rs10842240 | 12 | 24060075  | C | G | 0.116 | 0.022  |
| rs10850031 | 12 | 112771063 | T | G | 0.720 | -0.008 |
| rs10876418 | 12 | 39428802  | T | C | 0.233 | -0.012 |
| rs10878946 | 12 | 69642315  | T | C | 0.714 | -0.014 |
| rs11066301 | 12 | 112871372 | A | G | 0.566 | 0.011  |
| rs11115176 | 12 | 82465797  | T | C | 0.760 | 0.012  |
| rs11172702 | 12 | 39982413  | A | G | 0.923 | 0.014  |
| rs11611246 | 12 | 939480    | T | G | 0.210 | 0.024  |
| rs11611496 | 12 | 108413828 | A | G | 0.222 | -0.017 |
| rs12306932 | 12 | 38242029  | T | C | 0.511 | -0.001 |
| rs12369009 | 12 | 112019799 | T | G | 0.797 | -0.002 |
| rs12422552 | 12 | 14413931  | C | G | 0.266 | -0.013 |
| rs1558236  | 12 | 111780998 | C | G | 0.973 | -0.008 |
| rs17096549 | 12 | 38529333  | A | G | 0.976 | 0.021  |
| rs17608150 | 12 | 110046698 | T | C | 0.075 | 0.020  |
| rs1819844  | 12 | 68205604  | A | G | 0.180 | 0.014  |
| rs2240108  | 12 | 48180508  | T | C | 0.151 | -0.013 |
| rs2429150  | 12 | 2152655   | A | C | 0.584 | -0.011 |
| rs2467110  | 12 | 23067302  | T | C | 0.270 | -0.010 |
| rs2731222  | 12 | 90595383  | A | C | 0.270 | 0.013  |
| rs2733287  | 12 | 41880909  | A | C | 0.517 | -0.016 |
| rs3809272  | 12 | 111800258 | A | G | 0.284 | 0.006  |
| rs3887080  | 12 | 121661966 | A | G | 0.121 | 0.018  |
| rs4077093  | 12 | 51593616  | T | G | 0.217 | 0.013  |
| rs4759073  | 12 | 54653258  | A | G | 0.401 | -0.012 |
| rs4759228  | 12 | 56508409  | C | G | 0.297 | -0.016 |
| rs4764949  | 12 | 103658096 | A | G | 0.664 | 0.018  |
| rs4766710  | 12 | 114437708 | A | G | 0.936 | 0.023  |
| rs621042   | 12 | 18789007  | A | C | 0.451 | -0.011 |
| rs6490055  | 12 | 111768973 | A | G | 0.767 | -0.007 |

|            |    |           |   |   |       |        |
|------------|----|-----------|---|---|-------|--------|
| rs651548   | 12 | 99560183  | A | G | 0.368 | 0.014  |
| rs6580755  | 12 | 39159190  | T | C | 0.433 | -0.002 |
| rs6606686  | 12 | 110903380 | C | G | 0.690 | -0.014 |
| rs7133378  | 12 | 124409502 | A | G | 0.327 | 0.013  |
| rs7134375  | 12 | 20473758  | A | C | 0.434 | 0.008  |
| rs7138803  | 12 | 50247468  | A | G | 0.377 | 0.030  |
| rs7313924  | 12 | 89899912  | C | G | 0.714 | 0.010  |
| rs7958206  | 12 | 39329294  | A | G | 0.402 | 0.001  |
| rs7965658  | 12 | 49987929  | A | G | 0.200 | -0.002 |
| rs7968230  | 12 | 133481917 | A | G | 0.323 | 0.013  |
| rs7973955  | 12 | 118409640 | A | G | 0.285 | -0.013 |
| rs7975187  | 12 | 60964108  | A | G | 0.793 | -0.013 |
| rs884282   | 12 | 117579274 | T | C | 0.575 | -0.009 |
| rs1006353  | 13 | 28047269  | A | G | 0.249 | 0.013  |
| rs1045411  | 13 | 31033232  | T | C | 0.265 | -0.015 |
| rs10467530 | 13 | 54694130  | C | G | 0.137 | 0.015  |
| rs1218822  | 13 | 28011963  | A | G | 0.666 | 0.017  |
| rs12429545 | 13 | 54102206  | A | G | 0.125 | 0.032  |
| rs1333423  | 13 | 59425111  | A | T | 0.225 | 0.017  |
| rs1668633  | 13 | 78371890  | T | C | 0.574 | 0.010  |
| rs1927790  | 13 | 96922191  | T | C | 0.589 | -0.015 |
| rs2479958  | 13 | 111984244 | A | G | 0.493 | 0.015  |
| rs629443   | 13 | 76386075  | T | G | 0.250 | 0.012  |
| rs7334078  | 13 | 99120484  | T | C | 0.712 | 0.012  |
| rs892261   | 13 | 65884191  | T | C | 0.443 | -0.010 |
| rs9507983  | 13 | 28620036  | T | C | 0.607 | -0.016 |
| rs9527706  | 13 | 58402479  | A | G | 0.729 | -0.012 |
| rs9530843  | 13 | 79563749  | A | C | 0.556 | 0.013  |
| rs9538141  | 13 | 59178258  | A | G | 0.509 | 0.016  |
| rs9540493  | 13 | 66205704  | A | G | 0.442 | 0.014  |
| rs9544915  | 13 | 36230485  | T | C | 0.860 | 0.014  |
| rs9554263  | 13 | 28681228  | C | G | 0.769 | -0.011 |
| rs9571687  | 13 | 67472713  | A | C | 0.329 | -0.013 |
| rs9595908  | 13 | 33184288  | T | C | 0.628 | 0.016  |
| rs9603697  | 13 | 40783323  | T | C | 0.319 | 0.014  |
| rs10131890 | 14 | 97258752  | A | C | 0.950 | -0.022 |
| rs10132280 | 14 | 25928179  | A | C | 0.302 | -0.022 |
| rs10146527 | 14 | 79499850  | T | C | 0.636 | 0.014  |
| rs11844682 | 14 | 65910844  | C | G | 0.661 | -0.010 |
| rs1205106  | 14 | 72269668  | A | G | 0.542 | -0.008 |
| rs12147845 | 14 | 101144596 | T | C | 0.114 | 0.020  |
| rs12587412 | 14 | 47272423  | T | G | 0.490 | 0.015  |
| rs12885454 | 14 | 29736838  | A | C | 0.343 | -0.019 |
| rs12888545 | 14 | 88308044  | A | G | 0.748 | -0.014 |

|            |    |           |   |   |       |        |
|------------|----|-----------|---|---|-------|--------|
| rs17096552 | 14 | 98626578  | A | G | 0.136 | -0.015 |
| rs17105272 | 14 | 77529783  | T | C | 0.319 | 0.011  |
| rs17522122 | 14 | 33302882  | T | G | 0.481 | 0.016  |
| rs1951455  | 14 | 91512339  | T | C | 0.275 | -0.015 |
| rs1956151  | 14 | 40101060  | A | G | 0.821 | -0.013 |
| rs2003616  | 14 | 79903993  | T | G | 0.288 | 0.005  |
| rs2010281  | 14 | 103862322 | A | G | 0.355 | -0.016 |
| rs2160077  | 14 | 92428410  | A | G | 0.429 | 0.009  |
| rs217671   | 14 | 62360464  | A | G | 0.728 | -0.014 |
| rs2412107  | 14 | 65426216  | T | G | 0.208 | 0.011  |
| rs3803286  | 14 | 103246470 | A | G | 0.343 | 0.018  |
| rs3850422  | 14 | 99671788  | A | G | 0.446 | -0.011 |
| rs3902951  | 14 | 69789755  | T | G | 0.755 | -0.013 |
| rs4981693  | 14 | 29680331  | A | G | 0.771 | 0.021  |
| rs7144011  | 14 | 79940383  | T | G | 0.214 | 0.028  |
| rs7147503  | 14 | 101539384 | T | C | 0.370 | -0.012 |
| rs799132   | 14 | 82684748  | A | T | 0.221 | -0.011 |
| rs8016771  | 14 | 102649451 | T | G | 0.912 | -0.019 |
| rs8016859  | 14 | 30484722  | C | G | 0.040 | 0.035  |
| rs9806058  | 14 | 35673470  | A | T | 0.877 | 0.016  |
| rs10519151 | 15 | 77156899  | A | T | 0.067 | -0.010 |
| rs11259933 | 15 | 84580156  | A | G | 0.523 | -0.007 |
| rs11629783 | 15 | 66741387  | C | G | 0.769 | 0.015  |
| rs11635675 | 15 | 63793238  | T | G | 0.647 | 0.012  |
| rs11855853 | 15 | 78012618  | T | C | 0.265 | -0.015 |
| rs12101393 | 15 | 92570921  | C | G | 0.780 | 0.013  |
| rs12148386 | 15 | 77254544  | T | C | 0.458 | -0.005 |
| rs12439798 | 15 | 46584787  | T | G | 0.423 | 0.013  |
| rs12593036 | 15 | 81058652  | A | G | 0.701 | 0.015  |
| rs12595158 | 15 | 62316035  | T | C | 0.024 | -0.039 |
| rs12595749 | 15 | 79432359  | A | G | 0.571 | 0.014  |
| rs12902742 | 15 | 83647483  | A | T | 0.091 | 0.014  |
| rs13329567 | 15 | 68104367  | T | C | 0.231 | -0.029 |
| rs150353   | 15 | 89928189  | T | G | 0.556 | -0.010 |
| rs1657930  | 15 | 57120989  | A | G | 0.803 | -0.012 |
| rs16951319 | 15 | 68103632  | T | C | 0.134 | -0.007 |
| rs17238110 | 15 | 62150364  | A | G | 0.837 | 0.035  |
| rs2459359  | 15 | 76863838  | C | G | 0.948 | 0.009  |
| rs2593280  | 15 | 76150965  | A | G | 0.852 | 0.011  |
| rs316611   | 15 | 41751678  | T | C | 0.255 | 0.010  |
| rs340025   | 15 | 60908307  | T | C | 0.428 | -0.012 |
| rs3736485  | 15 | 51748610  | A | G | 0.456 | 0.013  |
| rs403656   | 15 | 76755506  | A | G | 0.850 | 0.009  |
| rs4284600  | 15 | 31843528  | T | C | 0.529 | -0.012 |

|            |    |          |   |   |       |        |
|------------|----|----------|---|---|-------|--------|
| rs4886506  | 15 | 77207277 | T | G | 0.695 | -0.001 |
| rs4886869  | 15 | 77799657 | A | G | 0.395 | -0.010 |
| rs4906908  | 15 | 27040082 | T | G | 0.475 | -0.010 |
| rs6494481  | 15 | 64849904 | T | G | 0.119 | 0.012  |
| rs6495252  | 15 | 78117685 | T | C | 0.383 | 0.010  |
| rs7164727  | 15 | 73093991 | T | C | 0.681 | 0.018  |
| rs7181498  | 15 | 95271404 | T | C | 0.369 | 0.016  |
| rs7181610  | 15 | 35826859 | A | T | 0.859 | 0.015  |
| rs8024932  | 15 | 77915282 | T | G | 0.893 | 0.009  |
| rs8033510  | 15 | 61445514 | T | C | 0.371 | 0.011  |
| rs8036040  | 15 | 36402716 | A | C | 0.493 | 0.011  |
| rs10083803 | 16 | 6701400  | T | C | 0.261 | -0.013 |
| rs10500548 | 16 | 69174141 | T | C | 0.058 | 0.019  |
| rs1057452  | 16 | 29833714 | A | G | 0.037 | 0.017  |
| rs11074446 | 16 | 20255123 | T | C | 0.869 | 0.023  |
| rs11075489 | 16 | 62803841 | T | C | 0.483 | -0.011 |
| rs11075986 | 16 | 53805344 | C | G | 0.915 | 0.032  |
| rs11642001 | 16 | 71899586 | A | G | 0.212 | -0.014 |
| rs11866815 | 16 | 387867   | T | C | 0.246 | -0.016 |
| rs12443621 | 16 | 52548037 | A | G | 0.533 | -0.010 |
| rs12446632 | 16 | 19935389 | A | G | 0.142 | -0.035 |
| rs12448257 | 16 | 3599655  | A | G | 0.218 | 0.018  |
| rs12448738 | 16 | 56489343 | A | C | 0.863 | -0.017 |
| rs12920590 | 16 | 67420603 | T | C | 0.648 | -0.003 |
| rs12922346 | 16 | 82438337 | C | G | 0.266 | 0.014  |
| rs1549293  | 16 | 31141993 | T | C | 0.360 | -0.020 |
| rs1564981  | 16 | 50986308 | A | G | 0.458 | 0.009  |
| rs16952479 | 16 | 53770578 | A | T | 0.946 | -0.015 |
| rs17795934 | 16 | 51926509 | T | C | 0.298 | -0.009 |
| rs1862451  | 16 | 24803620 | A | G | 0.731 | 0.014  |
| rs2075205  | 16 | 54153099 | A | T | 0.587 | 0.011  |
| rs2080454  | 16 | 49062590 | A | C | 0.621 | -0.013 |
| rs2307022  | 16 | 68381978 | A | G | 0.334 | 0.014  |
| rs2516739  | 16 | 2097158  | A | G | 0.217 | -0.016 |
| rs2534760  | 16 | 6509009  | A | T | 0.706 | -0.010 |
| rs2863981  | 16 | 68295598 | A | G | 0.410 | 0.008  |
| rs3751813  | 16 | 53818708 | T | G | 0.541 | 0.060  |
| rs3794702  | 16 | 3730613  | A | T | 0.196 | 0.004  |
| rs3814883  | 16 | 29994922 | T | C | 0.476 | 0.023  |
| rs4783241  | 16 | 82650384 | C | G | 0.494 | -0.011 |
| rs4985155  | 16 | 15129459 | A | G | 0.663 | 0.012  |
| rs6564360  | 16 | 76779612 | A | G | 0.810 | -0.014 |
| rs7187776  | 16 | 28857645 | A | G | 0.593 | -0.027 |
| rs7195386  | 16 | 24578458 | T | C | 0.501 | 0.013  |



|            |    |          |   |   |       |        |
|------------|----|----------|---|---|-------|--------|
| rs7200919  | 16 | 67316600 | A | G | 0.413 | 0.010  |
| rs7206608  | 16 | 82872628 | C | G | 0.685 | -0.013 |
| rs756717   | 16 | 72996162 | A | G | 0.397 | -0.015 |
| rs7919     | 16 | 70514828 | A | C | 0.450 | -0.016 |
| rs8046061  | 16 | 80752293 | T | C | 0.550 | 0.009  |
| rs8047395  | 16 | 53798523 | A | G | 0.506 | 0.064  |
| rs825680   | 16 | 73606563 | A | T | 0.583 | 0.010  |
| rs868554   | 16 | 20050466 | C | G | 0.754 | -0.019 |
| rs879620   | 16 | 4015729  | T | C | 0.618 | 0.023  |
| rs889398   | 16 | 69556715 | T | C | 0.425 | -0.020 |
| rs907011   | 16 | 54234492 | T | G | 0.703 | 0.010  |
| rs952159   | 16 | 71965915 | A | G | 0.335 | 0.000  |
| rs977540   | 16 | 9724750  | A | G | 0.762 | 0.014  |
| rs9922708  | 16 | 53831146 | T | C | 0.432 | 0.069  |
| rs9927848  | 16 | 23833071 | A | C | 0.733 | -0.012 |
| rs9931164  | 16 | 53825238 | A | G | 0.982 | 0.025  |
| rs9931407  | 16 | 67290155 | T | C | 0.967 | -0.001 |
| rs9931967  | 16 | 20375351 | T | G | 0.508 | 0.016  |
| rs1000940  | 17 | 5283252  | A | G | 0.701 | -0.015 |
| rs1038088  | 17 | 28074563 | T | G | 0.492 | -0.012 |
| rs1048775  | 17 | 79202329 | C | G | 0.480 | 0.006  |
| rs10515050 | 17 | 51923847 | T | C | 0.415 | -0.008 |
| rs1075901  | 17 | 15943910 | T | C | 0.436 | -0.012 |
| rs1106908  | 17 | 34942595 | A | G | 0.441 | -0.016 |
| rs11079849 | 17 | 47090785 | T | C | 0.320 | -0.019 |
| rs12453418 | 17 | 31747629 | A | G | 0.653 | -0.010 |
| rs12602912 | 17 | 65870073 | T | C | 0.205 | 0.018  |
| rs1285245  | 17 | 77796889 | C | G | 0.367 | -0.012 |
| rs12939549 | 17 | 78611724 | A | G | 0.567 | 0.018  |
| rs16966801 | 17 | 39573713 | A | G | 0.798 | -0.016 |
| rs17681708 | 17 | 9792872  | T | C | 0.688 | -0.011 |
| rs208015   | 17 | 46252346 | T | C | 0.078 | 0.036  |
| rs2537847  | 17 | 65694355 | A | G | 0.244 | -0.011 |
| rs2619976  | 17 | 71754545 | T | C | 0.413 | 0.010  |
| rs4516268  | 17 | 1846831  | A | C | 0.193 | -0.022 |
| rs4796243  | 17 | 35057883 | A | G | 0.303 | -0.012 |
| rs4889782  | 17 | 78640510 | T | C | 0.603 | -0.015 |
| rs4969387  | 17 | 79081724 | C | G | 0.746 | -0.015 |
| rs4986044  | 17 | 21261560 | T | C | 0.469 | -0.016 |
| rs7209235  | 17 | 73759552 | A | G | 0.695 | -0.011 |
| rs7211567  | 17 | 31460899 | T | C | 0.220 | -0.015 |
| rs7217226  | 17 | 2136065  | T | G | 0.640 | -0.013 |
| rs757608   | 17 | 59497277 | A | G | 0.338 | -0.009 |
| rs8067737  | 17 | 29349688 | T | C | 0.110 | 0.017  |

|            |    |          |   |   |       |        |
|------------|----|----------|---|---|-------|--------|
| rs8069296  | 17 | 42935059 | T | C | 0.793 | -0.010 |
| rs8070454  | 17 | 38160754 | T | C | 0.387 | -0.010 |
| rs8071182  | 17 | 55336155 | A | G | 0.174 | 0.013  |
| rs8075273  | 17 | 61728881 | A | C | 0.282 | -0.013 |
| rs8079034  | 17 | 5412361  | T | C | 0.188 | 0.010  |
| rs8081039  | 17 | 75995829 | T | C | 0.057 | 0.023  |
| rs886444   | 17 | 46051911 | A | G | 0.396 | -0.010 |
| rs9299     | 17 | 46669430 | T | C | 0.647 | 0.012  |
| rs9905991  | 17 | 80052073 | A | G | 0.448 | 0.010  |
| rs10438964 | 18 | 42950629 | T | C | 0.276 | -0.013 |
| rs11150911 | 18 | 73498528 | A | C | 0.281 | 0.013  |
| rs11659764 | 18 | 53335512 | A | T | 0.053 | -0.025 |
| rs12327272 | 18 | 57726627 | A | G | 0.114 | 0.005  |
| rs1241986  | 18 | 6873954  | A | G | 0.848 | -0.014 |
| rs12964689 | 18 | 21116998 | A | G | 0.518 | 0.020  |
| rs1365466  | 18 | 36182440 | T | C | 0.741 | -0.014 |
| rs1498139  | 18 | 51478026 | A | C | 0.727 | 0.011  |
| rs1608445  | 18 | 947954   | A | G | 0.435 | -0.010 |
| rs16965062 | 18 | 31581247 | T | C | 0.430 | 0.009  |
| rs1787267  | 18 | 76742544 | C | G | 0.063 | -0.024 |
| rs1791253  | 18 | 37103550 | T | G | 0.063 | 0.019  |
| rs1941697  | 18 | 31251276 | A | G | 0.454 | 0.012  |
| rs1942866  | 18 | 57741783 | C | G | 0.624 | -0.031 |
| rs2000746  | 18 | 57677294 | A | G | 0.734 | 0.018  |
| rs2012927  | 18 | 63297672 | A | G | 0.335 | 0.013  |
| rs2229616  | 18 | 58039276 | T | C | 0.020 | -0.106 |
| rs273697   | 18 | 23178748 | A | G | 0.478 | -0.010 |
| rs555267   | 18 | 40992698 | T | G | 0.330 | 0.013  |
| rs663129   | 18 | 57838401 | A | G | 0.230 | 0.055  |
| rs7239114  | 18 | 45921214 | A | G | 0.540 | 0.012  |
| rs7243357  | 18 | 56883319 | T | G | 0.827 | 0.019  |
| rs8087550  | 18 | 58371566 | A | C | 0.492 | 0.000  |
| rs8089514  | 18 | 69224478 | A | T | 0.359 | 0.013  |
| rs8092503  | 18 | 52479487 | A | G | 0.769 | -0.017 |
| rs8094523  | 18 | 57878155 | A | G | 0.080 | -0.031 |
| rs8095404  | 18 | 57804346 | A | T | 0.544 | -0.026 |
| rs8097544  | 18 | 1839564  | A | G | 0.848 | -0.020 |
| rs954018   | 18 | 42598463 | A | G | 0.305 | -0.013 |
| rs9675376  | 18 | 57969244 | A | G | 0.288 | 0.035  |
| rs9951893  | 18 | 60739250 | T | C | 0.525 | -0.012 |
| rs9961813  | 18 | 57853056 | A | C | 0.913 | 0.013  |
| rs10408013 | 19 | 33963766 | T | C | 0.291 | 0.011  |
| rs11668301 | 19 | 31016196 | A | G | 0.848 | 0.021  |
| rs11672660 | 19 | 46180184 | T | C | 0.205 | -0.034 |

|            |    |          |   |   |       |        |
|------------|----|----------|---|---|-------|--------|
| rs12609744 | 19 | 12994140 | T | C | 0.693 | -0.013 |
| rs17724992 | 19 | 18454825 | A | G | 0.740 | 0.018  |
| rs2075650  | 19 | 45395619 | A | G | 0.861 | 0.024  |
| rs2304130  | 19 | 19789528 | A | G | 0.915 | 0.018  |
| rs273504   | 19 | 18215247 | A | G | 0.573 | -0.015 |
| rs2866816  | 19 | 30683879 | T | C | 0.739 | 0.013  |
| rs29938    | 19 | 34311481 | T | C | 0.328 | -0.015 |
| rs3810291  | 19 | 47569003 | A | G | 0.670 | 0.027  |
| rs3826705  | 19 | 42637232 | T | C | 0.879 | -0.016 |
| rs757318   | 19 | 18820308 | A | C | 0.481 | -0.019 |
| rs8102137  | 19 | 30296853 | T | C | 0.676 | -0.019 |
| rs895330   | 19 | 4060707  | C | G | 0.808 | 0.020  |
| rs998732   | 19 | 19378671 | A | G | 0.842 | 0.017  |
| rs1015362  | 20 | 32738612 | T | C | 0.287 | -0.004 |
| rs1015363  | 20 | 32738335 | A | G | 0.556 | -0.002 |
| rs1040881  | 20 | 15099816 | T | C | 0.674 | 0.011  |
| rs12480713 | 20 | 15801600 | T | C | 0.564 | 0.007  |
| rs12625413 | 20 | 62380542 | T | C | 0.655 | -0.008 |
| rs13041173 | 20 | 32542814 | A | G | 0.659 | -0.011 |
| rs13045538 | 20 | 33595525 | T | C | 0.960 | -0.009 |
| rs143384   | 20 | 34025756 | A | G | 0.589 | -0.001 |
| rs1512065  | 20 | 53453326 | A | G | 0.237 | 0.014  |
| rs17091470 | 20 | 32606299 | T | G | 0.925 | 0.002  |
| rs17806379 | 20 | 51107290 | T | C | 0.179 | -0.026 |
| rs1884389  | 20 | 1410582  | T | C | 0.429 | -0.010 |
| rs1884897  | 20 | 6612832  | A | G | 0.369 | -0.019 |
| rs2143253  | 20 | 41987392 | A | G | 0.119 | -0.019 |
| rs2386802  | 20 | 25971327 | A | C | 0.668 | -0.004 |
| rs2425241  | 20 | 35018412 | T | C | 0.067 | -0.020 |
| rs2425857  | 20 | 44914134 | A | G | 0.441 | 0.012  |
| rs293566   | 20 | 31097877 | T | C | 0.653 | -0.002 |
| rs310618   | 20 | 62127121 | T | C | 0.671 | -0.011 |
| rs3746429  | 20 | 33703607 | T | C | 0.173 | 0.011  |
| rs4814512  | 20 | 16564210 | A | C | 0.782 | 0.013  |
| rs559267   | 20 | 54157497 | A | G | 0.664 | -0.012 |
| rs6011457  | 20 | 61530915 | A | T | 0.498 | -0.012 |
| rs6019482  | 20 | 47495560 | T | C | 0.165 | -0.018 |
| rs6058635  | 20 | 30891925 | C | G | 0.435 | -0.001 |
| rs6060151  | 20 | 33594226 | T | G | 0.632 | 0.003  |
| rs6061162  | 20 | 29893501 | T | C | 0.913 | 0.008  |
| rs6076348  | 20 | 25401827 | A | G | 0.692 | -0.001 |
| rs6088529  | 20 | 33170752 | A | C | 0.342 | 0.001  |
| rs6088943  | 20 | 34420023 | A | T | 0.939 | 0.011  |
| rs6121381  | 20 | 30785593 | A | T | 0.847 | -0.015 |

|            |    |          |   |   |       |        |
|------------|----|----------|---|---|-------|--------|
| rs6132918  | 20 | 26073030 | T | C | 0.823 | -0.011 |
| rs6138482  | 20 | 25059442 | T | C | 0.197 | 0.015  |
| rs6142096  | 20 | 32686658 | A | G | 0.528 | 0.014  |
| rs676749   | 20 | 3026069  | A | T | 0.502 | -0.010 |
| rs753010   | 20 | 29857455 | C | G | 0.949 | -0.009 |
| rs8121840  | 20 | 30504530 | A | G | 0.493 | 0.009  |
| rs8123881  | 20 | 15819495 | A | G | 0.870 | -0.020 |
| rs816533   | 20 | 26256565 | A | G | 0.962 | -0.017 |
| rs8567     | 20 | 62522315 | A | G | 0.523 | -0.009 |
| rs13047416 | 21 | 40309436 | C | G | 0.623 | 0.015  |
| rs2836961  | 21 | 40627020 | A | C | 0.617 | -0.010 |
| rs2838006  | 21 | 42653567 | T | C | 0.362 | -0.013 |
| rs427943   | 21 | 46570896 | A | C | 0.433 | -0.017 |
| rs762147   | 21 | 39238610 | A | G | 0.271 | -0.012 |
| rs9979651  | 21 | 34153330 | C | G | 0.929 | -0.017 |
| rs4820408  | 22 | 40604945 | T | G | 0.408 | 0.015  |
| rs5750913  | 22 | 40640285 | A | G | 0.754 | -0.001 |
| rs9615905  | 22 | 48875699 | T | C | 0.450 | 0.011  |

Chr=chromosome.

Effect allele is the one associated with high risk of obesity; and other is the reference allele. Each SNP's relative effect size  $\beta$  was obtained from the ancestry-specific analysis of Europeans in the latest Genome-wide multi-ethnic meta-analysis.

**Table S2. Diet component definitions used in the AMED score**

| <b>Components</b>                         | <b>Criteria for minimum score of 0</b> | <b>Criteria for maximum score of 1</b> | <b>Field IDs</b>                                                                                                                                                 |
|-------------------------------------------|----------------------------------------|----------------------------------------|------------------------------------------------------------------------------------------------------------------------------------------------------------------|
| Fruit                                     | Less than median intake                | Greater than median intake             | 100190,100200 (Fruit juice)<br>1004410-104590 (Whole fruit and dried fruit)                                                                                      |
| Vegetable                                 | Less than median intake                | Greater than median intake             | 104060-104380 (All vegetables except potatoes and beans)<br>104000, 104010, 104110, 104120, 104280 (Beans)                                                       |
| Legumes                                   | Less than median intake                | Greater than median intake             | 103270 (Tofu)<br>104000, 104010, 104110, 104120, 104280 (Beans)                                                                                                  |
| Whole grains                              | Less than median intake                | Greater than median intake             | 100770, 100830, 100840, 100850, 102720, 102740, 102780 (Cereal)<br>100810, 101260 (Oat)<br>100950, 101020, 101090, 101160 (Bread)<br>20091-20094 (Type of bread) |
| Nuts                                      | Less than median intake                | Greater than median intake             | 102410-102450 (Peanut, nuts, seeds)                                                                                                                              |
| Fish                                      | Less than median intake                | Greater than median intake             | 103150-103230 (Fish and seafood)                                                                                                                                 |
| Red and processed meats                   | Greater than median intake             | Less than median intake                | 103010 (Sausage), 103070 (Bacon), 103080 (Ham)                                                                                                                   |
| Ratio of monounsaturated to saturated fat | Less than median intake                | Greater than median intake             | 100004 (Fat), 100007 (Polyunsaturated fat), 100006 (Saturated fat)                                                                                               |
| Ethanol                                   | <5 or >25 g                            | 5–25 g/d                               | 100022 (Alcohol)                                                                                                                                                 |
| Total score                               | 0                                      | 9                                      | □                                                                                                                                                                |

**Table S3. Basic characteristics of participants from UK Biobank according to fried potato consumption or fried white consumption**

| □<br>Characteristics                | Fried potato intake (serving/day) |        |       |       | □<br>Characteristics                | Fried white meat intake (serving/day) |       |       |       |
|-------------------------------------|-----------------------------------|--------|-------|-------|-------------------------------------|---------------------------------------|-------|-------|-------|
|                                     | 0                                 | 0-1    | 1-1.5 | ≥1.5  |                                     | 0                                     | 0-0.5 | 0.5-1 | ≥1    |
| <b>N</b>                            | 12,782                            | 10,651 | 3089  | 905   | <b>N</b>                            | 23,590                                | 2025  | 1087  | 725   |
| <b>Male (%)</b>                     | 43.3                              | 47.3   | 56.9  | 60.7  | <b>Male (%)</b>                     | 46.0                                  | 52.7  | 53.4  | 53.4  |
| <b>race (%)</b>                     |                                   |        |       |       | <b>race (%)</b>                     |                                       |       |       |       |
| White                               | 96.9                              | 97.3   | 97.3  | 97.0  | White                               | 97.1                                  | 97.4  | 97.2  | 96.3  |
| Non-white                           | 2.9                               | 2.4    | 2.5   | 2.8   | Non-white                           | 2.7                                   | 2.4   | 2.5   | 3.3   |
| <b>Age (year)</b>                   | 55.8                              | 55.4   | 53.7  | 51.9  | <b>Age (year)</b>                   | 55.3 ±7.6                             | 55.2  | 54.9  | 54.0  |
|                                     | ±7.4                              | ±7.6   | ±7.8  | ±7.9  |                                     |                                       | ±7.6  | ±7.6  | ±7.7  |
| <b>BMI (kg/m<sup>2</sup>)</b>       | 24.9                              | 25.0   | 25.3  | 25.4  | <b>BMI (kg/m<sup>2</sup>)</b>       | 25.0 ±2.7                             | 25.1  | 25.1  | 25.4  |
|                                     | ±2.7                              | ±2.6   | ±2.6  | ±2.6  |                                     |                                       | ±2.7  | ±2.7  | ±2.7  |
| <b>Physical activity (MET-h/wk)</b> | 42.1                              | 40.1   | 41.5  | 42.0  | <b>Physical activity (MET-h/wk)</b> | 41.3                                  | 39.3  | 41.5  | 44.0  |
|                                     | ±39.1                             | ±37.6  | ±41.3 | ±42.5 |                                     | ±38.8                                 | ±37.4 | ±40.5 | ±44.8 |
| <b>SBP (mmHg)</b>                   | 136.5                             | 136.9  | 136.1 | 135.1 | <b>SBP (mmHg)</b>                   | 136.5                                 | 137.2 | 136.6 | 135.9 |
|                                     | ±19.2                             | ±19.0  | ±18.5 | ±17.2 |                                     | ±19.1                                 | ±18.7 | ±17.6 | ±18.8 |
| <b>DBP (mmHg)</b>                   | 80.2                              | 80.7   | 80.9  | 80.7  | <b>DBP (mmHg)</b>                   | 80.4                                  | 80.9  | 81.2  | 80.5  |
|                                     | ±10.3                             | ±10.3  | ±10.7 | ±10.2 |                                     | ±10.3                                 | ±10.4 | ±10.4 | ±10.6 |
| <b>Blood glucose (mmol/L)</b>       | 5.0                               | 5.0    | 4.9   | 4.9   | <b>Blood glucose (mmol/L)</b>       | 5.0 ±0.9                              | 5.0   | 4.9   | 4.9   |
|                                     | ±0.8                              | ±0.8   | ±0.9  | ±0.9  |                                     |                                       | ±0.8  | ±0.7  | ±1.0  |
| <b>Household income (£) (%)†</b>    |                                   |        |       |       | <b>Household income (£) (%)†</b>    |                                       |       |       |       |
| < 18,000                            | 10.4                              | 9.5    | 8.9   | 9.5   | < 18,000                            | 9.7                                   | 11.1  | 10.9  | 9.1   |
| 18,000 to 30,999                    | 20.1                              | 20.9   | 19.8  | 19.3  | 18,000 to 30,999                    | 20.5                                  | 19.5  | 20.6  | 18.8  |
| 31,000 to 51,999                    | 27.2                              | 27.9   | 29.9  | 30.5  | 31,000 to 51,999                    | 27.7                                  | 28.3  | 27.4  | 30.6  |
| 52,000 to 100,000                   | 26.5                              | 26.4   | 27.3  | 27.9  | 52,000 to 100,000                   | 26.7                                  | 26.0  | 24.7  | 26.5  |

|                                             |              |              |              |              |                                             |           |              |              |              |
|---------------------------------------------|--------------|--------------|--------------|--------------|---------------------------------------------|-----------|--------------|--------------|--------------|
| > 100,000                                   | 7.7          | 8.0          | 6.0          | 5.2          | > 100,000                                   | 7.6       | 7.7          | 6.7          | 7.0          |
| <b>Education</b>                            |              |              |              |              | <b>Education</b>                            |           |              |              |              |
| College or University degree                | 53.5         | 52.6         | 44.7         | 41.7         | College or University degree                | 52.0      | 53.4         | 48.4         | 44.7         |
| Vocational qualifications                   | 9.0          | 9.5          | 10.2         | 10.8         | Vocational qualifications                   | 9.3       | 9.1          | 10.6         | 11.3         |
| Optional national exams at ages 17-18 years | 13.1         | 13.5         | 13.2         | 13.7         | Optional national exams at ages 17-18 years | 13.3      | 13.3         | 13.4         | 12.0         |
| National exams at age 16 years              | 19.8         | 19.9         | 25.7         | 29.4         | National exams at age 16 years              | 20.7      | 19.5         | 22.5         | 25.5         |
| Others                                      | 4.5          | 4.3          | 6.0          | 4.0          | Others                                      | 4.5       | 4.6          | 4.7          | 6.3          |
| Townsend deprivation index‡                 | -2.0<br>±2.7 | -2.1<br>±2.6 | -2.1<br>±2.7 | -2.0<br>±2.6 | Townsend deprivation index‡                 | -2.0 ±2.7 | -2.1<br>±2.6 | -1.9<br>±2.7 | -2.0<br>±2.7 |
| <b>Smoking (%)</b>                          |              |              |              |              | <b>Smoking (%)</b>                          |           |              |              |              |
| Never                                       | 63.7         | 62.2         | 58.3         | 60.2         | Never                                       | 62.0      | 65.5         | 64.7         | 63.2         |
| Previous                                    | 30.9         | 32.1         | 33.7         | 29.7         | Previous                                    | 32.1      | 28.9         | 29.3         | 28.4         |
| Current                                     | 5.3          | 5.5          | 7.7          | 9.6          | Current                                     | 5.8       | 5.4          | 5.5          | 8.1          |
| <b>Alcohol drinking (%)</b>                 |              |              |              |              | <b>Alcohol drinking (%)</b>                 |           |              |              |              |
| Never or special occasions only             | 23.2         | 20.5         | 20.1         | 22.5         | Never or special occasions only             | 21.6      | 23.0         | 22.5         | 23.5         |
| 1 to 3 times/month                          | 25.1         | 24.6         | 25.0         | 25.4         | 1 to 3 times/month                          | 24.8      | 25.7         | 25.9         | 25.0         |
| 1 or 2 times/week                           | 29.0         | 29.7         | 30.4         | 26.7         | 1 or 2 times/week                           | 29.6      | 27.8         | 27.6         | 29.9         |
| 3 or 4 times/week                           | 22.6         | 25.1         | 24.4         | 25.2         | 3 or 4 times/week                           | 24.0      | 23.5         | 23.9         | 21.7         |
| <b>Sleep pattern</b>                        |              |              |              |              | <b>Sleep pattern</b>                        |           |              |              |              |
| Poor                                        | 4.0          | 3.4          | 4.9          | 4.9          | Poor                                        | 3.8       | 3.7          | 4.3          | 5.7          |
| Intermediate                                | 56.5         | 56.6         | 57.7         | 60.2         | Intermediate                                | 56.7      | 57.3         | 57.9         | 57.1         |
| Healthy                                     | 39.5         | 40.0         | 37.4         | 34.8         | Healthy                                     | 39.5      | 39.1         | 37.6         | 37.2         |
| <b>History of hypertension (%)</b>          | 45.25        | 47           | 44.77        | 42.32        | <b>History of hypertension</b>              | 45.64     | 47.8         | 45.72        | 44.83        |

|                                 |        |        |        |         |                                 |          |        |        |        |
|---------------------------------|--------|--------|--------|---------|---------------------------------|----------|--------|--------|--------|
| <b>History of diabetes (%)</b>  | 1.9    | 2.0    | 2.3    | 2.3     | <b>History of diabetes (%)</b>  | 2.1      | 2.0    | 1.5    | 1.2    |
| <b>Mediterranean Diet Score</b> | 4.0    | 4.3    | 3.4    | 3.3     | <b>Mediterranean Diet Score</b> | 4.0 ±1.9 | 4.4    | 4.4    | 4.0    |
|                                 | ±1.9   | ±1.8   | ±1.7   | ±1.7    |                                 |          | ±1.7   | ±1.7   | ±1.8   |
| <b>Energy intake</b>            | 8456.7 | 9072.6 | 9978.6 | 11384.4 | <b>Energy intake</b>            | 8915.0   | 9122.2 | 9193.1 | 9768.7 |
|                                 | ±2488. | ±2189. | ±2639. | ±3055.  |                                 | ±2514.9  | ±2192. | ±2335. | ±3012. |
|                                 | 3      | 9      | 2      | 6       |                                 |          | 9      | 6      | 1      |
| <b>Vitamin use (%)</b>          | 33.1   | 30.3   | 31.6   | 29.7    | <b>Vitamin use (%)</b>          | 31.8     | 30.6   | 31.0   | 32.3   |
| <b>Mineral use (%)</b>          | 14.4   | 12.2   | 10.5   | 10.1    | <b>Mineral use (%)</b>          | 13.0     | 12.4   | 13.0   | 10.5   |

†£1.00=\$1.30, or €1.20.

‡The Townsend deprivation index (TDI) was an indicator of material deprivation that was calculated based on non-home ownership, non-car ownership, unemployment, and household over-crowding.



**Table S4. Multivariable-adjusted HRs (95% CIs) for the associations of fried potato with obesity incidence**

|                                             | Fried potato (serving/day) |                  |                  |                  | P-trend | per 1-SD         | P value |
|---------------------------------------------|----------------------------|------------------|------------------|------------------|---------|------------------|---------|
|                                             | 0                          | 0-1              | 1-1.5            | ≥1.5             |         |                  |         |
| <b>N</b>                                    | 12,782                     | 10,651           | 3089             | 905              |         |                  |         |
| <b>Obesity case</b>                         | 627                        | 553              | 200              | 92               |         |                  |         |
| Model 1†                                    | 1.00 (Ref.)                | 1.09 (0.97-1.22) | 1.31 (1.11-1.53) | 2.06 (1.65-2.57) | <0.001  | 1.15 (1.10-1.20) | <0.001  |
| Model 2‡                                    | 1.00 (Ref.)                | 1.11 (0.98-1.24) | 1.12 (0.95-1.32) | 1.59 (1.26-2.00) | <0.001  | 1.08 (1.03-1.13) | 0.003   |
| Model 3§                                    | 1.00 (Ref.)                | 1.06 (0.94-1.19) | 1.07 (0.90-1.26) | 1.45 (1.15-1.82) | 0.015   | 1.05 (1.00-1.10) | 0.045   |
| <b>Abdominal obesity case</b>               | 1277                       | 1111             | 363              | 142              |         |                  |         |
| Model 1†                                    | 1.00 (Ref.)                | 1.14 (1.05-1.23) | 1.36 (1.21-1.53) | 2.02 (1.70-2.41) | <0.001  | 1.16 (1.13-1.20) | <0.001  |
| Model 2‡                                    | 1.00 (Ref.)                | 1.11 (1.03-1.21) | 1.18 (1.04-1.33) | 1.63 (1.36-1.95) | <0.001  | 1.10 (1.06-1.14) | <0.001  |
| Model 3§                                    | 1.00 (Ref.)                | 1.06 (0.97-1.15) | 1.10 (0.98-1.25) | 1.49 (1.24-1.79) | <0.001  | 1.07 (1.03-1.11) | <0.001  |
| <b>Case for having a ≥5% BMI increase</b>   | 2410                       | 2024             | 688              | 262              |         |                  |         |
| Model 1†                                    | 1.00 (Ref.)                | 1.04 (0.98-1.11) | 1.20 (1.10-1.31) | 1.60 (1.40-1.81) | <0.001  | 1.10 (1.07-1.13) | <0.001  |
| Model 2‡                                    | 1.00 (Ref.)                | 1.04 (0.97-1.10) | 1.08 (0.99-1.18) | 1.32 (1.16-1.51) | <0.001  | 1.05 (1.02-1.08) | <0.001  |
| Model 3§                                    | 1.00 (Ref.)                | 1.04 (0.98-1.10) | 1.09 (0.99-1.19) | 1.33 (1.17-1.52) | <0.001  | 1.05 (1.03-1.08) | <0.001  |
| <b>Case for having a ≥5% WC increase¶</b>   | 4177                       | 3401             | 1080             | 343              |         |                  |         |
| Model 1†                                    | 1.00 (Ref.)                | 1.03 (0.99-1.08) | 1.16 (1.09-1.25) | 1.32 (1.18-1.48) | <0.001  | 1.07 (1.05-1.09) | <0.001  |
| Model 2‡                                    | 1.00 (Ref.)                | 1.02 (0.97-1.07) | 1.07 (1.00-1.14) | 1.17 (1.04-1.31) | 0.008   | 1.03 (1.01-1.05) | 0.010   |
| Model 3§                                    | 1.00 (Ref.)                | 1.04 (0.99-1.09) | 1.10 (1.02-1.18) | 1.23 (1.10-1.38) | <0.001  | 1.04 (1.02-1.07) | <0.001  |
| <b>Case for having a ≥5% BF% increase  </b> | 5912                       | 5095             | 1583             | 497              |         |                  |         |
| Model 1†                                    | 1.00 (Ref.)                | 1.07 (1.03-1.11) | 1.09 (1.03-1.15) | 1.18 (1.07-1.29) | <0.001  | 1.04 (1.02-1.06) | <0.001  |
| Model 2‡                                    | 1.00 (Ref.)                | 1.04 (1.00-1.08) | 0.99 (0.94-1.05) | 1.03 (0.93-1.13) | 0.497   | 1.00 (0.98-1.02) | 0.924   |
| Model 3§                                    | 1.00 (Ref.)                | 1.06 (1.02-1.10) | 1.02 (0.97-1.09) | 1.08 (0.98-1.18) | 0.039   | 1.01 (1.00-1.03) | 0.145   |

BMI=body mass index, WC=waist circumference, BF=body fat, HRs=hazard ratios, CIs= confidence intervals.

Cox proportional hazards regression analyses were used to calculate the HRs and 95% CIs.

\*P-trend was obtained by including the categories of fried food intake as a continuous variable in the model.

†Model 1 was adjusted for age (continuous) and sex (male or female).

‡Model 2 was further adjusted for race (white or non-white), centers (22 categories), education (college or university degree, vocational qualifications, optional national exams at ages 17–18 years, national exams at age 16 years, others, or missing), Townsend deprivation index (quartiles), household income (<£18,000, £18,000-£30,999, £31,000-£51,999, £52,000-£100,000, >£100,000, or missing), smoking (never, former, current, or missing), alcohol consumption (never or special occasions only, 1 or 2 times/week, 3 or 4 times/week, ≥5 times/week, or missing), physical activity (quartiles), sleep pattern (poor, medium, healthy), Mediterranean diet score (quartiles), fried white meat intake, other fried food and energy intake (quartiles).

§ Model 3 was further adjusted for baseline BMI (in kg/m<sup>2</sup>; <18.5, 18.5 to 25, 25 to 30) for obesity or adjusted for baseline BMI (in kg/m<sup>2</sup>; <18.5, 18.5 to 25, 25 to 30) and WC (quartiles) for abdominal obesity.

¶ Excluding 3 participants without data of WC at baseline or follow-up duration.

|| Excluding 710 participants without data of BF% at baseline or follow-up duration.

**Table S5. Multivariable-adjusted HRs (95% CIs) for the associations of fried white meat with obesity incidence**

|                                             | Fried white meat (serving/day) |                  |                  |                  | P-trend | per 1-SD         | P value |
|---------------------------------------------|--------------------------------|------------------|------------------|------------------|---------|------------------|---------|
|                                             | 0                              | 0-0.5            | 0.5-1.0          | ≥1.0             |         |                  |         |
| <b>N</b>                                    | 23,590                         | 2025             | 1087             | 725              |         |                  |         |
| <b>Obesity case</b>                         | 1244                           | 113              | 63               | 52               |         |                  |         |
| Model 1†                                    | 1.00 (Ref.)                    | 1.15 (0.95-1.39) | 1.11 (0.86-1.43) | 1.39 (1.06-1.84) | 0.011   | 1.05 (1.01-1.08) | 0.018   |
| Model 2‡                                    | 1.00 (Ref.)                    | 1.16 (0.95-1.41) | 1.10 (0.85-1.42) | 1.25 (0.95-1.66) | 0.048   | 1.08 (1.03-1.13) | 0.107   |
| Model 3§                                    | 1.00 (Ref.)                    | 1.11 (0.91-1.35) | 1.13 (0.87-1.47) | 1.17 (0.88-1.55) | 0.110   | 1.05 (1.00-1.10) | 0.092   |
| <b>Abdominal obesity case</b>               | 2493                           | 208              | 117              | 75               |         |                  |         |
| Model 1†                                    | 1.00 (Ref.)                    | 1.11 (0.96-1.27) | 1.11 (0.92-1.34) | 1.13 (0.90-1.42) | 0.070   | 1.03 (0.99-1.06) | 0.131   |
| Model 2‡                                    | 1.00 (Ref.)                    | 1.07 (0.93-1.24) | 1.03 (0.85-1.24) | 0.98 (0.78-1.24) | 0.737   | 1.00 (0.97-1.04) | 0.883   |
| Model 3§                                    | 1.00 (Ref.)                    | 1.04 (0.90-1.20) | 1.08 (0.89-1.30) | 0.85 (0.67-1.08) | 0.671   | 0.99 (0.95-1.03) | 0.565   |
| <b>Case for having a ≥5% BMI increase</b>   | 4620                           | 383              | 225              | 156              |         |                  |         |
| Model 1†                                    | 1.00 (Ref.)                    | 1.07 (0.96-1.18) | 1.07 (0.94-1.23) | 1.16 (0.99-1.36) | 0.025   | 1.02 (1.00-1.05) | 0.059   |
| Model 2‡                                    | 1.00 (Ref.)                    | 1.06 (0.95-1.18) | 1.04 (0.91-1.20) | 1.09 (0.92-1.28) | 0.165   | 1.01 (0.99-1.04) | 0.270   |
| Model 3§                                    | 1.00 (Ref.)                    | 1.06 (0.95-1.18) | 1.04 (0.91-1.20) | 1.09 (0.93-1.28) | 0.155   | 1.01 (0.99-1.04) | 0.257   |
| <b>Case for having a ≥5% WC increase¶</b>   | 7771                           | 663              | 343              | 224              |         |                  |         |
| Model 1†                                    | 1.00 (Ref.)                    | 1.12 (1.03-1.21) | 0.99 (0.89-1.10) | 0.99 (0.87-1.14) | 0.475   | 1.00 (0.98-1.02) | 0.940   |
| Model 2‡                                    | 1.00 (Ref.)                    | 1.11 (1.03-1.21) | 0.93 (0.83-1.03) | 0.96 (0.84-1.10) | 0.704   | 0.99 (0.97-1.01) | 0.351   |
| Model 3§                                    | 1.00 (Ref.)                    | 1.12 (1.03-1.21) | 0.94 (0.84-1.05) | 1.01 (0.88-1.16) | 0.742   | 1.00 (0.98-1.02) | 0.646   |
| <b>Case for having a ≥5% BF% increase  </b> | 11,214                         | 990              | 520              | 363              |         |                  |         |
| Model 1†                                    | 1.00 (Ref.)                    | 1.13 (1.06-1.21) | 0.99 (0.91-1.08) | 1.09 (0.98-1.21) | 0.023   | 1.01 (0.99-1.02) | 0.297   |
| Model 2‡                                    | 1.00 (Ref.)                    | 1.11 (1.04-1.19) | 0.96 (0.88-1.05) | 1.07 (0.97-1.19) | 0.156   | 1.00 (0.99-1.02) | 0.769   |
| Model 3§                                    | 1.00 (Ref.)                    | 1.13 (1.06-1.21) | 0.96 (0.88-1.04) | 1.10 (0.99-1.22) | 0.085   | 1.00 (0.99-1.02) | 0.613   |

BMI=body mass index, WC=waist circumference, BF=body fat, HRs=hazard ratios, CIs= confidence intervals.

Cox proportional hazards regression analyses were used to calculate the HRs and 95% CIs.

\*P-trend was obtained by including the categories of fried food intake as a continuous variable in the model.

†Model 1 was adjusted for age (continuous) and sex (male or female).

‡Model 2 was further adjusted for race (white or non-white), centers (22 categories), education (college or university degree, vocational qualifications, optional national exams at ages 17–18 years, national exams at age 16 years, others, or missing), Townsend deprivation index (quartiles), household income (<£18,000, £18,000-£30,999, £31,000-£51,999, £52,000-£100,000, >£100,000, or missing), smoking (never, former, current, or missing), alcohol consumption (never or special occasions only, 1 or 2 times/week, 3 or 4 times/week, ≥5 times/week, or missing), physical activity (quartiles), sleep pattern (poor, medium, healthy), Mediterranean diet score (quartiles), fried white meat intake, other fried food and energy intake (quartiles).

§ Model 3 was further adjusted for baseline BMI (in kg/m<sup>2</sup>; <18.5, 18.5 to 25, 25 to 30) for obesity or adjusted for baseline BMI (in kg/m<sup>2</sup>; <18.5, 18.5 to 25, 25 to 30) and WC (quartiles) for abdominal obesity.

¶ Excluding 3 participants without data of WC at baseline or follow-up duration.

|| Excluding 710 participants without data of BF% at baseline or follow-up duration.

**Table S6. Multivariable Hazard Ratios (95% CIs) of fried food consumption and obesity incidence from sensitivity analyses.**

|                                                                | Fried food intake (serving/day) |                  |                  |                  | P-trend* | P for 1SD        |
|----------------------------------------------------------------|---------------------------------|------------------|------------------|------------------|----------|------------------|
|                                                                | 0                               | 0-1              | 1-1.5            | ≥1.5             |          |                  |
| <b>Further adjustment for hypertension at baseline</b>         |                                 |                  |                  |                  |          |                  |
| No of participants                                             | 10,232                          | 10,408           | 4191             | 2596             |          |                  |
| No of obesity (%)                                              | 499 (4.9)                       | 527 (5.1)        | 244 (5.8)        | 202 (7.8)        |          |                  |
| Multivariable-adjusted model†                                  | 1.00 (Ref.)                     | 1.10 (0.97-1.25) | 1.05 (0.90-1.23) | 1.31 (1.11-1.56) | 0.009    | 1.06 (1.01-1.11) |
| No of abdominal obesity (%)                                    | 1019 (10.0)                     | 1074 (10.3)      | 467 (11.1)       | 333 (12.8)       |          |                  |
| Multivariable-adjusted model†                                  | 1.00 (Ref.)                     | 1.09 (1.00-1.19) | 1.05 (0.94-1.17) | 1.28 (1.12-1.45) | 0.002    | 1.05 (1.02-1.09) |
| <b>Further adjustment for diabetes at baseline</b>             |                                 |                  |                  |                  |          |                  |
| No of participants                                             | 10,232                          | 10,408           | 4191             | 2596             |          |                  |
| No of obesity (%)                                              | 499 (4.9)                       | 527 (5.1)        | 244 (5.8)        | 202 (7.8)        |          |                  |
| Multivariable-adjusted model†                                  | 1.00 (Ref.)                     | 1.10 (0.97-1.25) | 1.06 (0.91-1.24) | 1.32 (1.11-1.57) | 0.008    | 1.06 (1.01-1.11) |
| No of abdominal obesity (%)                                    | 1019 (10.0)                     | 1074 (10.3)      | 467 (11.1)       | 333 (12.8)       |          |                  |
| Multivariable-adjusted model†                                  | 1.00 (Ref.)                     | 1.09 (1.00-1.19) | 1.05 (0.94-1.17) | 1.28 (1.12-1.45) | 0.002    | 1.05 (1.02-1.09) |
| <b>Further adjustment for vitamin or mineral supplementary</b> |                                 |                  |                  |                  |          |                  |
| No of participants                                             | 10,232                          | 10,408           | 4191             | 2596             |          |                  |
| No of obesity (%)                                              | 499 (4.9)                       | 527 (5.1)        | 244 (5.8)        | 202 (7.8)        |          |                  |
| Multivariable-adjusted model†                                  | 1.00 (Ref.)                     | 1.10 (0.97-1.24) | 1.06 (0.90-1.24) | 1.31 (1.11-1.56) | 0.008    | 1.06 (1.01-1.11) |
| No of abdominal obesity (%)                                    | 1019 (10.0)                     | 1074 (10.3)      | 467 (11.1)       | 333 (12.8)       |          |                  |
| Multivariable-adjusted model†                                  | 1.00 (Ref.)                     | 1.09 (1.00-1.19) | 1.05 (0.94-1.17) | 1.28 (1.12-1.46) | 0.002    | 1.05 (1.02-1.09) |
| <b>Further adjustment for time being sedentary</b>             |                                 |                  |                  |                  |          |                  |
| No of participants                                             | 10,232                          | 10,408           | 4191             | 2596             |          |                  |
| No of obesity (%)                                              | 499 (4.9)                       | 527 (5.1)        | 244 (5.8)        | 202 (7.8)        |          |                  |
| Multivariable-adjusted model†                                  | 1.00 (Ref.)                     | 1.09 (0.96-1.23) | 1.05 (0.90-1.23) | 1.29 (1.09-1.54) | 0.014    | 1.06 (1.01-1.11) |
| No of abdominal obesity (%)                                    | 1019 (10.0)                     | 1074 (10.3)      | 467 (11.1)       | 333 (12.8)       |          |                  |
| Multivariable-adjusted model†                                  | 1.00 (Ref.)                     | 1.09 (1.00-1.19) | 1.04 (0.93-1.16) | 1.27 (1.11-1.44) | 0.003    | 1.05 (1.01-1.09) |

**Further adjustment for lifestyle changes‡**

|                               |             |                  |                  |                  |       |                  |
|-------------------------------|-------------|------------------|------------------|------------------|-------|------------------|
| No of participants            | 10,232      | 10,408           | 4191             | 2596             |       |                  |
| No of obesity (%)             | 499 (4.9)   | 527 (5.1)        | 244 (5.8)        | 202 (7.8)        |       |                  |
| Multivariable-adjusted model† | 1.00 (Ref.) | 1.08 (0.95-1.22) | 1.04 (0.89-1.22) | 1.28 (1.08-1.52) | 0.019 | 1.05 (1.00-1.10) |
| No of abdominal obesity (%)   | 1019 (10.0) | 1074 (10.3)      | 467 (11.1)       | 333 (12.8)       |       |                  |
| Multivariable-adjusted model† | 1.00 (Ref.) | 1.08 (0.99-1.18) | 1.04 (0.93-1.17) | 1.27 (1.11-1.44) | 0.003 | 1.05 (1.01-1.09) |

**Excluding extreme lower BMI ( $\leq 15$  kg/m<sup>2</sup>)**

|                               |             |                  |                  |                  |       |                  |
|-------------------------------|-------------|------------------|------------------|------------------|-------|------------------|
| No of participants            | 10,231      | 10,408           | 4191             | 2596             |       |                  |
| No of obesity (%)             | 499 (4.9)   | 527 (5.1)        | 244 (5.8)        | 202 (7.8)        |       |                  |
| Multivariable-adjusted model† | 1.00 (Ref.) | 1.10 (0.97-1.24) | 1.06 (0.90-1.24) | 1.31 (1.11-1.56) | 0.008 | 1.06 (1.01-1.11) |
| No of abdominal obesity (%)   | 1019 (10.0) | 1074 (10.3)      | 467 (11.1)       | 333 (12.8)       |       |                  |
| Multivariable-adjusted model† | 1.00 (Ref.) | 1.09 (1.00-1.19) | 1.05 (0.94-1.17) | 1.28 (1.12-1.45) | 0.002 | 1.05 (1.02-1.09) |

**Excluding extreme energy intake¶**

|                               |             |                  |                  |                  |       |                  |
|-------------------------------|-------------|------------------|------------------|------------------|-------|------------------|
| No of participants            | 10,162      | 10,350           | 4145             | 2520             |       |                  |
| No of obesity (%)             | 495 (4.9)   | 522 (5.0)        | 243 (5.9)        | 197 (7.8)        |       |                  |
| Multivariable-adjusted model† | 1.00 (Ref.) | 1.10 (0.97-1.24) | 1.07 (0.91-1.25) | 1.32 (1.11-1.57) | 0.007 | 1.06 (1.01-1.11) |
| No of abdominal obesity (%)   | 1015 (10.0) | 1065 (10.3)      | 462 (11.2)       | 322 (12.8)       |       |                  |
| Multivariable-adjusted model† | 1.00 (Ref.) | 1.09 (1.00-1.19) | 1.06 (0.94-1.18) | 1.26 (1.10-1.43) | 0.003 | 1.05 (1.01-1.09) |

**Excluding participants with missing covariate data**

|                               |             |                  |                  |                  |       |                  |
|-------------------------------|-------------|------------------|------------------|------------------|-------|------------------|
| No of participants            | 8242        | 8471             | 3395             | 2122             |       |                  |
| No of obesity (%)             | 390 (4.7)   | 438 (5.2)        | 196 (5.8)        | 167 (7.9)        |       |                  |
| Multivariable-adjusted model† | 1.00 (Ref.) | 1.15 (1.00-1.33) | 1.08 (0.91-1.29) | 1.41 (1.17-1.71) | 0.003 | 1.07 (1.01-1.13) |
| No of abdominal obesity (%)   | 802 (9.7)   | 849 (10.0)       | 382 (11.3)       | 278 (13.1)       |       |                  |
| Multivariable-adjusted model† | 1.00 (Ref.) | 1.08 (0.97-1.19) | 1.09 (0.96-1.24) | 1.29 (1.12-1.49) | 0.001 | 1.06 (1.02-1.10) |

**Excluding participants with cardiometabolic diseases during follow-up||**

|                    |           |           |           |           |  |  |
|--------------------|-----------|-----------|-----------|-----------|--|--|
| No of participants | 9587      | 9787      | 3909      | 2433      |  |  |
| No of obesity (%)  | 453 (4.7) | 496 (5.1) | 223 (5.7) | 187 (7.7) |  |  |

|                               |             |                  |                  |                  |       |                  |
|-------------------------------|-------------|------------------|------------------|------------------|-------|------------------|
| Multivariable-adjusted model† | 1.00 (Ref.) | 1.12 (0.98-1.27) | 1.07 (0.91-1.26) | 1.35 (1.13-1.62) | 0.005 | 1.09 (1.02-1.16) |
| No of abdominal obesity (%)   | 933 (9.7)   | 1003 (10.3)      | 434 (11.1)       | 304 (12.5)       |       |                  |
| Multivariable-adjusted model‡ | 1.00 (Ref.) | 1.08 (0.99-1.18) | 1.07 (0.95-1.20) | 1.27 (1.11-1.46) | 0.002 | 1.07 (1.02-1.13) |

Cox proportional hazards regression analyses were used to calculate the HRs and 95% CIs.

\* P-trend was obtained by including the categories of fried food intake as a continuous variable in the model.

† The multivariable model was adjusted for age, sex, race, centers, BMI, household income, Townsend deprivation index, smoking, alcohol consumption, physical activity, history of hypertension, history of hyper cholesterol, family history of cardiovascular disease, family history of diabetes, vitamin supplement use, mineral supplement use, aspirin use, and diabetes duration.

‡ Lifestyle includes smoking status, alcohol consumption frequency, physical activity, and sleep pattern.

¶ Extreme energy intake was <800 or >4200 kcal/d for men and <600 or >3500 kcal/d for women.

|| Cardiometabolic diseases include type 2 diabetes, coronary heart disease, and stroke.

**Table S7. Multivariable Hazard Ratios (95% CIs) of fried potato consumption and obesity incidence from sensitivity analyses.**

| □                                                              | Fried potato intake (serving/day) |                  |                  |                  | P-trend* | P for 1-SD       |
|----------------------------------------------------------------|-----------------------------------|------------------|------------------|------------------|----------|------------------|
|                                                                | 0                                 | 0-1              | 1-1.5            | ≥1.5             |          |                  |
| <b>Further adjustment for hypertension at baseline</b>         |                                   |                  |                  |                  |          |                  |
| No of participants                                             | 12,782                            | 10,651           | 3089             | 905              |          |                  |
| No of obesity (%)                                              | 627 (4.9)                         | 553 (5.2)        | 200 (6.5)        | 92 (10.2)        |          |                  |
| Multivariable-adjusted model†                                  | 1.00 (Ref.)                       | 1.09 (0.96-1.24) | 1.09 (0.91-1.31) | 1.51 (1.18-1.94) | 0.007    | 1.06 (1.01-1.12) |
| No of abdominal obesity (%)                                    | 1277 (10.0)                       | 1111 (10.4)      | 363 (11.8)       | 142 (15.7)       |          |                  |
| Multivariable-adjusted model†                                  | 1.00 (Ref.)                       | 1.07 (0.98-1.18) | 1.12 (0.99-1.28) | 1.61 (1.33-1.95) | <0.001   | 1.09 (1.05-1.13) |
| <b>Further adjustment for diabetes at baseline</b>             |                                   |                  |                  |                  |          |                  |
| No of participants                                             | 12,782                            | 10,651           | 3089             | 905              |          |                  |
| No of obesity (%)                                              | 627 (4.9)                         | 553 (5.2)        | 200 (6.5)        | 92 (10.2)        |          |                  |
| Multivariable-adjusted model†                                  | 1.00 (Ref.)                       | 1.09 (0.96-1.24) | 1.10 (0.92-1.32) | 1.49 (1.16-1.92) | 0.008    | 1.06 (1.01-1.11) |
| No of abdominal obesity (%)                                    | 1277 (10.0)                       | 1111 (10.4)      | 363 (11.8)       | 142 (15.7)       |          |                  |
| Multivariable-adjusted model†                                  | 1.00 (Ref.)                       | 1.07 (0.98-1.18) | 1.12 (0.98-1.28) | 1.61 (1.33-1.94) | <0.001   | 1.09 (1.05-1.13) |
| <b>Further adjustment for vitamin or mineral supplementary</b> |                                   |                  |                  |                  |          |                  |
| No of participants                                             | 12,782                            | 10,651           | 3089             | 905              |          |                  |
| No of obesity (%)                                              | 627 (4.9)                         | 553 (5.2)        | 200 (6.5)        | 92 (10.2)        |          |                  |
| Multivariable-adjusted model†                                  | 1.00 (Ref.)                       | 1.09 (0.96-1.24) | 1.10 (0.92-1.32) | 1.49 (1.16-1.91) | 0.008    | 1.06 (1.01-1.11) |
| No of abdominal obesity (%)                                    | 1277 (10.0)                       | 1111 (10.4)      | 363 (11.8)       | 142 (15.7)       |          |                  |
| Multivariable-adjusted model†                                  | 1.00 (Ref.)                       | 1.08 (0.98-1.18) | 1.12 (0.98-1.28) | 1.61 (1.33-1.95) | <0.001   | 1.09 (1.05-1.13) |
| <b>Further adjustment for time being sedentary</b>             |                                   |                  |                  |                  |          |                  |
| No of participants                                             | 12,782                            | 10,651           | 3089             | 905              |          |                  |
| No of obesity (%)                                              | 627 (4.9)                         | 553 (5.2)        | 200 (6.5)        | 92 (10.2)        |          |                  |
| Multivariable-adjusted model†                                  | 1.00 (Ref.)                       | 1.08 (0.95-1.23) | 1.09 (0.91-1.30) | 1.46 (1.14-1.88) | 0.013    | 1.05 (1.00-1.11) |
| No of abdominal obesity (%)                                    | 1277 (10.0)                       | 1111 (10.4)      | 363 (11.8)       | 142 (15.7)       |          |                  |
| Multivariable-adjusted model†                                  | 1.00 (Ref.)                       | 1.07 (0.98-1.17) | 1.12 (0.98-1.27) | 1.59 (1.31-1.92) | <0.001   | 1.09 (1.05-1.13) |



**Further adjustment for lifestyle change‡**

|                               |             |                  |                  |                  |        |                  |
|-------------------------------|-------------|------------------|------------------|------------------|--------|------------------|
| No of participants            | 12,782      | 10,651           | 3089             | 905              |        |                  |
| No of obesity (%)             | 627 (4.9)   | 553 (5.2)        | 200 (6.5)        | 92 (10.2)        |        |                  |
| Multivariable-adjusted model† | 1.00 (Ref.) | 1.05 (0.93-1.18) | 1.07 (0.90-1.26) | 1.42 (1.12-1.79) | 0.021  | 1.04 (1.00-1.10) |
| No of abdominal obesity (%)   | 1277 (10.0) | 1111 (10.4)      | 363 (11.8)       | 142 (15.7)       |        |                  |
| Multivariable-adjusted model† | 1.00 (Ref.) | 1.05 (0.97-1.14) | 1.11 (0.98-1.25) | 1.51 (1.25-1.81) | <0.001 | 1.07 (1.03-1.11) |

**Excluding extreme lower BMI ( $\leq 15$  kg/m<sup>2</sup>)**

|                               |             |                  |                  |                  |        |                  |
|-------------------------------|-------------|------------------|------------------|------------------|--------|------------------|
| No of participants            | 12,781      | 10,651           | 3089             | 905              |        |                  |
| No of obesity (%)             | 627 (4.9)   | 553 (5.2)        | 200 (6.5)        | 92 (10.2)        | 0.008  | 1.06 (1.01-1.11) |
| Multivariable-adjusted model† | 1.00 (Ref.) | 1.09 (0.96-1.24) | 1.10 (0.92-1.32) | 1.49 (1.16-1.91) |        |                  |
| No of abdominal obesity (%)   | 1277 (10.0) | 1111 (10.4)      | 363 (11.8)       | 142 (15.7)       |        |                  |
| Multivariable-adjusted model† | 1.00 (Ref.) | 1.07 (0.98-1.18) | 1.12 (0.98-1.28) | 1.61 (1.33-1.94) | <0.001 | 1.09 (1.05-1.13) |

**Excluding extreme energy intake¶**

|                               |             |                  |                  |                  |        |                  |
|-------------------------------|-------------|------------------|------------------|------------------|--------|------------------|
| No of participants            | 12,672      | 10,595           | 3044             | 866              |        |                  |
| No of obesity (%)             | 620 (4.9)   | 549 (5.2)        | 199 (6.5)        | 89 (10.3)        |        |                  |
| Multivariable-adjusted model† | 1.00 (Ref.) | 1.09 (0.96-1.24) | 1.12 (0.93-1.34) | 1.52 (1.18-1.96) | 0.005  | 1.06 (1.01-1.12) |
| No of abdominal obesity (%)   | 1268 (10.0) | 1102 (10.4)      | 361 (11.9)       | 133 (15.4)       |        |                  |
| Multivariable-adjusted model† | 1.00 (Ref.) | 1.07 (0.98-1.17) | 1.13 (0.99-1.29) | 1.56 (1.28-1.90) | <0.001 | 1.08 (1.04-1.13) |

**Excluding participants with missing covariate data**

|                               |             |                  |                  |                  |        |                  |
|-------------------------------|-------------|------------------|------------------|------------------|--------|------------------|
| No of participants            | 10,319      | 8686             | 2484             | 741              |        |                  |
| No of obesity (%)             | 495 (4.8)   | 466 (5.4)        | 154 (6.2)        | 76 (10.3)        |        |                  |
| Multivariable-adjusted model† | 1.00 (Ref.) | 1.12 (0.98-1.28) | 1.05 (0.87-1.27) | 1.56 (1.20-2.01) | 0.009  | 1.06 (1.01-1.12) |
| No of abdominal obesity (%)   | 1003 (9.7)  | 898 (10.3)       | 289 (11.6)       | 121 (16.3)       |        |                  |
| Multivariable-adjusted model† | 1.00 (Ref.) | 1.07 (0.97-1.17) | 1.13 (0.98-1.29) | 1.58 (1.29-1.92) | <0.001 | 1.09 (1.04-1.13) |

**Excluding participants with cardiometabolic diseases during the follow-up||**

|                    |           |           |           |          |  |  |
|--------------------|-----------|-----------|-----------|----------|--|--|
| No of participants | 11,992    | 9990      | 2878      | 856      |  |  |
| No of obesity (%)  | 572 (4.8) | 521 (5.2) | 181 (6.3) | 85 (9.9) |  |  |

|                               |             |                  |                  |                  |       |                  |
|-------------------------------|-------------|------------------|------------------|------------------|-------|------------------|
| Multivariable-adjusted model† | 1.00 (Ref.) | 1.08 (0.95-1.22) | 1.07 (0.90-1.28) | 1.44 (1.13-1.83) | 0.017 | 1.09 (1.00-1.18) |
| No of abdominal obesity (%)   | 1182 (9.9)  | 1032 (10.3)      | 331 (11.5)       | 129 (15.1)       |       |                  |
| Multivariable-adjusted model† | 1.00 (Ref.) | 1.04 (0.95-1.13) | 1.10 (0.97-1.25) | 1.44 (1.19-1.74) | 0.002 | 1.11 (1.04-1.19) |

Cox proportional hazards regression analyses were used to calculate the HRs and 95% CIs.

\* P-trend was obtained by including the categories of fried food intake as a continuous variable in the model.

† The multivariable model was adjusted for age, sex, race, centers, BMI, household income, Townsend deprivation index, smoking, alcohol consumption, physical activity, history of hypertension, history of hyper cholesterol, family history of cardiovascular disease, family history of diabetes, vitamin supplement use, mineral supplement use, aspirin use, and diabetes duration.

‡ Lifestyle includes smoking status, alcohol consumption frequency, physical activity, and sleep pattern.

¶ Extreme energy intake was <800 or >4200 kcal/d for men and <600 or >3500 kcal/d for women.

|| Cardiometabolic diseases include type 2 diabetes, coronary heart disease, and stroke.

**Table S8. Multivariable Hazard Ratios (95% CIs) of fried white consumption and obesity incidence from sensitivity analyses.**

| □                                                              | Fried white meat intake (serving/day) |                  |                  |                  | P-trend* | P for 1-SD       |
|----------------------------------------------------------------|---------------------------------------|------------------|------------------|------------------|----------|------------------|
|                                                                | 0                                     | 0-0.5            | 0.5-1            | ≥1               |          |                  |
| <b>Further adjustment for hypertension at baseline</b>         |                                       |                  |                  |                  |          |                  |
| No of participants                                             | 23,590                                | 2025             | 1087             | 725              |          |                  |
| No of obesity (%)                                              | 1244 (5.3)                            | 113 (5.6)        | 63 (5.8)         | 52 (7.2)         |          |                  |
| Multivariable-adjusted model†                                  | 1.00 (Ref.)                           | 1.12 (0.91-1.39) | 1.16 (0.88-1.53) | 1.24 (0.92-1.67) | 0.056    | 1.05 (1.00-1.09) |
| No of abdominal obesity (%)                                    | 2493 (10.6)                           | 208 (10.3)       | 117 (10.8)       | 75 (10.3)        |          |                  |
| Multivariable-adjusted model†                                  | 1.00 (Ref.)                           | 1.03 (0.88-1.20) | 1.11 (0.90-1.37) | 0.85 (0.66-1.09) | 0.705    | 0.99 (0.95-1.03) |
| <b>Further adjustment for diabetes at baseline</b>             |                                       |                  |                  |                  |          |                  |
| No of participants                                             | 23,590                                | 2025             | 1087             | 725              |          |                  |
| No of obesity (%)                                              | 1244 (5.3)                            | 113 (5.6)        | 63 (5.8)         | 52 (7.2)         |          |                  |
| Multivariable-adjusted model†                                  | 1.00 (Ref.)                           | 1.14 (0.92-1.40) | 1.17 (0.89-1.55) | 1.25 (0.93-1.68) | 0.043    | 1.05 (1.00-1.09) |
| No of abdominal obesity (%)                                    | 2493 (10.6)                           | 208 (10.3)       | 117 (10.8)       | 75 (10.3)        |          |                  |
| Multivariable-adjusted model†                                  | 1.00 (Ref.)                           | 1.03 (0.88-1.20) | 1.11 (0.90-1.36) | 0.85 (0.66-1.08) | 0.702    | 0.99 (0.95-1.03) |
| <b>Further adjustment for vitamin or mineral supplementary</b> |                                       |                  |                  |                  |          |                  |
| No of participants                                             | 23,590                                | 2025             | 1087             | 725              |          |                  |
| No of obesity (%)                                              | 1244 (5.3)                            | 113 (5.6)        | 63 (5.8)         | 52 (7.2)         |          |                  |
| Multivariable-adjusted model†                                  | 1.00 (Ref.)                           | 1.14 (0.92-1.40) | 1.16 (0.88-1.54) | 1.24 (0.92-1.67) | 0.051    | 1.05 (1.00-1.09) |
| No of abdominal obesity (%)                                    | 2493 (10.6)                           | 208 (10.3)       | 117 (10.8)       | 75 (10.3)        |          |                  |
| Multivariable-adjusted model†                                  | 1.00 (Ref.)                           | 1.03 (0.88-1.20) | 1.11 (0.90-1.37) | 0.85 (0.66-1.08) | 0.695    | 0.99 (0.95-1.03) |
| <b>Further adjustment for time being sedentary</b>             |                                       |                  |                  |                  |          |                  |
| No of participants                                             | 23,590                                | 2025             | 1087             | 725              |          |                  |
| No of obesity (%)                                              | 1244 (5.3)                            | 113 (5.6)        | 63 (5.8)         | 52 (7.2)         |          |                  |
| Multivariable-adjusted model†                                  | 1.00 (Ref.)                           | 1.12 (0.90-1.38) | 1.15 (0.87-1.51) | 1.23 (0.91-1.65) | 0.072    | 1.04 (1.00-1.09) |
| No of abdominal obesity (%)                                    | 2493 (10.6)                           | 208 (10.3)       | 117 (10.8)       | 75 (10.3)        |          |                  |
| Multivariable-adjusted model†                                  | 1.00 (Ref.)                           | 1.02 (0.87-1.19) | 1.11 (0.90-1.36) | 0.84 (0.66-1.08) | 0.639    | 0.99 (0.95-1.03) |

**Further adjustment for lifestyle changes‡**

|                               |             |                  |                  |                  |       |                  |
|-------------------------------|-------------|------------------|------------------|------------------|-------|------------------|
| No of participants            | 23,590      | 2025             | 1087             | 725              |       |                  |
| No of obesity (%)             | 1244 (5.3)  | 113 (5.6)        | 63 (5.8)         | 52 (7.2)         |       |                  |
| Multivariable-adjusted model† | 1.00 (Ref.) | 1.08 (0.88-1.31) | 1.10 (0.85-1.43) | 1.13 (0.85-1.49) | 0.224 | 1.03 (0.98-1.07) |
| No of abdominal obesity (%)   | 2493 (10.6) | 208 (10.3)       | 117 (10.8)       | 75 (10.3)        |       |                  |
| Multivariable-adjusted model† | 1.00 (Ref.) | 1.04 (0.90-1.20) | 1.07 (0.88-1.29) | 0.83 (0.65-1.04) | 0.489 | 0.98 (0.95-1.02) |

**Excluding extreme lower BMI ( $\leq 15$  kg/m<sup>2</sup>)**

|                               |             |                  |                  |                  |       |                  |
|-------------------------------|-------------|------------------|------------------|------------------|-------|------------------|
| No of participants            | 23,589      | 2025             | 1087             | 725              |       |                  |
| No of obesity (%)             | 1244 (5.3)  | 113 (5.6)        | 63 (5.8)         | 52 (7.2)         |       |                  |
| Multivariable-adjusted model† | 1.00 (Ref.) | 1.14 (0.92-1.40) | 1.16 (0.88-1.54) | 1.24 (0.92-1.67) | 0.051 | 1.05 (1.00-1.09) |
| No of abdominal obesity (%)   | 2493 (10.6) | 208 (10.3)       | 117 (10.8)       | 75 (10.3)        |       |                  |
| Multivariable-adjusted model† | 1.00 (Ref.) | 1.03 (0.88-1.20) | 1.11 (0.90-1.36) | 0.85 (0.66-1.08) | 0.702 | 0.99 (0.95-1.03) |

**Excluding extreme energy intake¶**

|                               |             |                  |                  |                  |       |                  |
|-------------------------------|-------------|------------------|------------------|------------------|-------|------------------|
| No of participants            | 23,371      | 2014             | 1081             | 711              |       |                  |
| No of obesity (%)             | 1229 (5.3)  | 113 (5.6)        | 63 (5.8)         | 52 (7.3)         |       |                  |
| Multivariable-adjusted model† | 1.00 (Ref.) | 1.15 (0.93-1.41) | 1.16 (0.88-1.54) | 1.25 (0.93-1.69) | 0.041 | 1.05 (1.00-1.10) |
| No of abdominal obesity (%)   | 2467 (10.6) | 206 (10.2)       | 117 (10.8)       | 74 (10.4)        |       |                  |
| Multivariable-adjusted model† | 1.00 (Ref.) | 1.03 (0.88-1.21) | 1.12 (0.91-1.38) | 0.85 (0.66-1.09) | 0.764 | 0.99 (0.95-1.03) |

**Excluding participants with missing covariate data**

|                               |             |                  |                  |                  |       |                  |
|-------------------------------|-------------|------------------|------------------|------------------|-------|------------------|
| No of participants            | 19,135      | 1663             | 845              | 587              |       |                  |
| No of obesity (%)             | 1006 (5.3)  | 94 (5.7)         | 49 (5.8)         | 42 (7.2)         |       |                  |
| Multivariable-adjusted model† | 1.00 (Ref.) | 1.11 (0.90-1.38) | 1.17 (0.87-1.56) | 1.20 (0.88-1.65) | 0.091 | 1.05 (1.00-1.10) |
| No of abdominal obesity (%)   | 1992 (10.4) | 166 (10.0)       | 93 (11.0)        | 60 (10.2)        |       |                  |
| Multivariable-adjusted model† | 1.00 (Ref.) | 1.03 (0.88-1.22) | 1.18 (0.96-1.46) | 0.84 (0.65-1.09) | 0.957 | 1.00 (0.96-1.04) |

**Excluding participants with cardiometabolic diseases during follow-up||**

|                    |        |      |      |     |  |  |
|--------------------|--------|------|------|-----|--|--|
| No of participants | 22,135 | 1898 | 1013 | 670 |  |  |
|--------------------|--------|------|------|-----|--|--|

|                               |             |                  |                  |                  |       |                  |
|-------------------------------|-------------|------------------|------------------|------------------|-------|------------------|
| No of obesity (%)             | 1152 (5.2)  | 104 (5.5)        | 58 (5.7)         | 45 (6.7)         |       |                  |
| Multivariable-adjusted model† | 1.00 (Ref.) | 1.08 (0.88-1.33) | 1.19 (0.91-1.56) | 1.15 (0.85-1.55) | 0.118 | 1.09 (0.98-1.21) |
| No of abdominal obesity (%)   | 2300 (10.4) | 194 (10.2)       | 110 (10.9)       | 70 (10.5)        |       |                  |
| Multivariable-adjusted model† | 1.00 (Ref.) | 1.04 (0.89-1.21) | 1.19 (0.98-1.44) | 0.87 (0.68-1.11) | 0.835 | 1.00 (0.91-1.09) |

Cox proportional hazards regression analyses were used to calculate the HRs and 95% CIs.

\* P-trend was obtained by including the categories of fried food intake as a continuous variable in the model.

† The multivariable model was adjusted for age, sex, race, centers, BMI, household income, Townsend deprivation index, smoking, alcohol consumption, physical activity, history of hypertension, history of hyper cholesterol, family history of cardiovascular disease, family history of diabetes, vitamin supplement use, mineral supplement use, aspirin use, and diabetes duration.

‡ Lifestyle includes smoking status, alcohol consumption frequency, physical activity, and sleep pattern.

¶ Extreme energy intake was <800 or >4200 kcal/d for men and <600 or >3500 kcal/d for women.

|| Cardiometabolic diseases include type 2 diabetes, coronary heart disease, and stroke.

**Table S9. Lifestyle characteristics of participants from the UK Biobank according to obesity at baseline and the follow-up time**

|                                 | Without obesity | With obesity | P value* |
|---------------------------------|-----------------|--------------|----------|
| <b>Baseline</b>                 |                 |              |          |
| Smoking (%)                     |                 |              | <0.001   |
| Never                           | 16,279 (62.8)   | 830 (56.5)   |          |
| Previous                        | 8185 (31.6)     | 489 (33.3)   |          |
| Current                         | 1447 (5.6)      | 151 (10.3)   |          |
| Alcohol drinking (%)            |                 |              | <0.001   |
| Never or special occasions only | 5541 (21.4)     | 441 (30.0)   |          |
| 1 to 3 times/month              | 6462 (24.9)     | 368 (25.0)   |          |
| 1 or 2 times/week               | 7691 (29.6)     | 362 (24.6)   |          |
| 3 or 4 times/week               | 6250 (24.1)     | 300 (20.4)   |          |
| Sleep pattern (%)               |                 |              | <0.001   |
| Poor                            | 970 (3.7)       | 99 (6.7)     |          |
| Intermediate                    | 14,652 (56.5)   | 922 (62.6)   |          |
| Healthy                         | 10327 (39.8)    | 450 (30.6)   |          |
| Physical activity (MET-h/wk)    | 41.28±38.80     | 46.80±40.13  | 0.007    |
| <b>The last assessment</b>      |                 |              |          |
| Smoking (%)                     |                 |              | <0.001   |
| Never                           | 16,639 (64.4)   | 845 (57.7)   |          |
| Previous                        | 8326 (32.2)     | 553 (37.8)   |          |
| Current                         | 861 (3.3)       | 66 (4.5)     |          |
| Alcohol drinking (%)            |                 |              | <0.001   |
| Never or special occasions only | 6562 (25.4)     | 500 (34.1)   |          |
| 1 to 3 times/month              | 6813 (26.3)     | 342 (23.3)   |          |
| 1 or 2 times/week               | 7747 (30.0)     | 353 (24.1)   |          |
| 3 or 4 times/week               | 4741 (18.3)     | 271 (18.5)   |          |
| Sleep pattern (%)               |                 |              | <0.001   |
| Poor                            | 1044 (4.0)      | 125 (8.5)    |          |
| Intermediate                    | 15,150 (58.6)   | 970 (66.2)   |          |
| Healthy                         | 9674 (37.4)     | 371 (25.3)   |          |
| Physical activity (MET-h/wk)    | 40.42±40.58     | 36.97±37.15  | <0.001   |
| <b>Change</b>                   |                 |              |          |
| Smoking (%)                     |                 |              | <0.001   |
| Increased                       | 436 (1.7)       | 28 (2.0)     |          |
| Unchanged                       | 23,951 (93.5)   | 1304 (90.8)  |          |
| Decreased                       | 1221 (4.8)      | 104 (7.2)    |          |
| Alcohol drinking (%)            |                 |              | 0.002    |
| Increased                       | 3277 (12.7)     | 221 (15.1)   |          |
| Unchanged                       | 16,239 (62.8)   | 934 (63.8)   |          |
| Decreased                       | 6336 (24.5)     | 310 (21.2)   |          |

|                       |               |            |        |
|-----------------------|---------------|------------|--------|
| Sleep pattern (%)     |               |            | 0.031  |
| Increased             | 3969 (15.3)   | 195 (13.3) |        |
| Unchanged             | 17,234 (66.6) | 977 (66.6) |        |
| Decreased             | 4665 (18.0)   | 294 (20.1) |        |
| Physical activity (%) |               |            | <0.001 |
| Increased             | 12,068 (57.4) | 566 (47.9) |        |
| Unchanged             | 135 (0.6)     | 13 (1.1)   |        |
| Decreased             | 8834 (42.0)   | 602 (51.0) |        |

---

MET=metabolic equivalent.

Data are either n (percentage) or mean±SD unless indicated otherwise.

\*P value for continuous variable of MET(h/week) was estimated through Mann Whitney U test as it was non-normal distribution and Pearson's  $\chi^2$  for categorical variables.
